# Supplementary material for: The western redcedar genome reveals low genetic diversity in a self-compatible conifer
Source: Genome Res. 2022 Oct;32(10):1952–64. doi: 10.1101/gr.276358.121 (PMC9712635; doi:10.1101/gr.276358.121)
Supplement: Supplemental Material [file supp_gr.276358.121_Supplemental_Dataset2.xlsx]

## Sheet: Dataset_S2-gene_functions
locusName	ID	ID Type	Description, if any; GO is via pfam2go/interpro
Thupl.10150191s0001	2.4.1.218	EC	Hydroquinone glucosyltransferase.
Thupl.10213767s0001	PTHR11058	PANTHER	NADH-UBIQUINONE OXIDOREDUCTASE CHAIN 3
Thupl.10213767s0001	KOG4662	KOG	NADH dehydrogenase subunit 3 and related proteins
Thupl.10213767s0001	GO:0055114	GO	oxidation-reduction process
Thupl.10213767s0001	PTHR11058:SF12	PANTHER
Thupl.10213767s0001	GO:0008137	GO	NADH dehydrogenase (ubiquinone) activity
Thupl.10213767s0001	K05574	KEGGORTH	NADH dehydrogenase I subunit 3 [EC:1.6.5.3]
Thupl.10213767s0001	PF00507	PFAM	NADH-ubiquinone/plastoquinone oxidoreductase, chain 3
Thupl.10732515s0001	SignalP-noTM	SIGNALP
Thupl.1088380s0001	PTHR31642	PANTHER	FAMILY NOT NAMED
Thupl.1088380s0001	2.3.1.188	EC	Omega-hydroxypalmitate O-feruloyl transferase.
Thupl.1088380s0001	PTHR31642:SF117	PANTHER
Thupl.1088380s0001	GO:0016747	GO	transferase activity, transferring acyl groups other than amino-acyl groups
Thupl.1088380s0001	PF02458	PFAM	Transferase family
Thupl.1098077s0001	PF03641	PFAM	Possible lysine decarboxylase
Thupl.1098077s0001	PTHR31208:SF1	PANTHER
Thupl.1098077s0001	K06966	KEGGORTH	protein pelota
Thupl.1098077s0001	PTHR31208	PANTHER	FAMILY NOT NAMED
Thupl.11469472s0001	PTHR34264:SF3	PANTHER
Thupl.11469472s0001	PTHR34264	PANTHER
Thupl.1149688s0001	PTHR24361	PANTHER	MITOGEN-ACTIVATED KINASE KINASE KINASE
Thupl.1149688s0001	GO:0005524	GO	ATP binding
Thupl.1149688s0001	GO:0006468	GO	protein phosphorylation
Thupl.1149688s0001	2.7.12.2	EC	Mitogen-activated protein kinase kinase.
Thupl.1149688s0001	KOG0581	KOG	Mitogen-activated protein kinase kinase (MAP2K)
Thupl.1149688s0001	PTHR24361:SF453	PANTHER
Thupl.1149688s0001	GO:0004672	GO	protein kinase activity
Thupl.1149688s0001	PF00069	PFAM	Protein kinase domain
Thupl.11524635s0001	PTHR24279:SF57	PANTHER
Thupl.11524635s0001	GO:0020037	GO	heme binding
Thupl.11524635s0001	GO:0016705	GO	oxidoreductase activity, acting on paired donors, with incorporation or reduction of molecular oxygen
Thupl.11524635s0001	GO:0055114	GO	oxidation-reduction process
Thupl.11524635s0001	GO:0005506	GO	iron ion binding
Thupl.11524635s0001	PF00067	PFAM	Cytochrome P450
Thupl.11524635s0001	1.14.13.78	EC	Ent-kaurene oxidase.
Thupl.11524635s0001	PTHR24279	PANTHER	FAMILY NOT NAMED
Thupl.1170258s0001	PTHR43930	PANTHER
Thupl.1203429s0001	PTHR31218	PANTHER	FAMILY NOT NAMED
Thupl.1203429s0001	PF00892	PFAM	EamA-like transporter family
Thupl.1203429s0001	GO:0016021	GO	integral to membrane
Thupl.1203429s0001	GO:0016020	GO	membrane
Thupl.1203429s0001	KOG1441	KOG	Glucose-6-phosphate/phosphate and phosphoenolpyruvate/phosphate antiporter
Thupl.1203429s0001	GO:0022857	GO	transmembrane transporter activity
Thupl.1226011s0001	PTHR10641	PANTHER	MYB-LIKE DNA-BINDING PROTEIN MYB
Thupl.1226011s0001	PF00249	PFAM	Myb-like DNA-binding domain
Thupl.1226011s0001	KOG0048	KOG	Transcription factor, Myb superfamily
Thupl.1226011s0001	PTHR10641:SF459	PANTHER
Thupl.13137866s0001	SignalP-TM	SIGNALP
Thupl.1315212s0001	PF00931	PFAM	NB-ARC domain
Thupl.1315212s0001	GO:0043531	GO	ADP binding
Thupl.1315212s0001	PTHR43886	PANTHER
Thupl.1330828s0001	GO:0043531	GO	ADP binding
Thupl.1330828s0001	PF00931	PFAM	NB-ARC domain
Thupl.1330828s0001	PTHR23155	PANTHER	LEUCINE-RICH REPEAT-CONTAINING PROTEIN
Thupl.1341732s0001	SignalP-noTM	SIGNALP
Thupl.1354093s0001	PTHR10027:SF10	PANTHER	CATION CHANNEL FAMILY PROTEIN-RELATED
Thupl.1354093s0001	PTHR10027	PANTHER	CALCIUM-ACTIVATED POTASSIUM CHANNEL ALPHA CHAIN
Thupl.13650501s0001	PF13947	PFAM	Wall-associated receptor kinase galacturonan-binding
Thupl.13650501s0001	SignalP-noTM	SIGNALP
Thupl.13650501s0001	GO:0030247	GO	polysaccharide binding
Thupl.1365560s0002	PF05405	PFAM	Mitochondrial ATP synthase B chain precursor (ATP-synt_B)
Thupl.1365560s0002	GO:0015986	GO	ATP synthesis coupled proton transport
Thupl.1365560s0002	GO:0000276	GO	mitochondrial proton-transporting ATP synthase complex, coupling factor F(o)
Thupl.1365560s0002	GO:0015078	GO	hydrogen ion transmembrane transporter activity
Thupl.1365560s0002	PTHR37774	PANTHER
Thupl.14084095s0001	PF00006	PFAM	ATP synthase alpha/beta family, nucleotide-binding domain
Thupl.14084095s0001	GO:0015986	GO	ATP synthesis coupled proton transport
Thupl.14084095s0001	3.6.3.14	EC	H(+)-transporting two-sector ATPase.
Thupl.14084095s0001	PTHR42875	PANTHER
Thupl.14084095s0001	PF00306	PFAM	ATP synthase alpha/beta chain, C terminal domain
Thupl.14084095s0001	GO:0005524	GO	ATP binding
Thupl.1423212s0001	PTHR36316	PANTHER
Thupl.1448551s0001	PTHR10871:SF8	PANTHER
Thupl.1448551s0001	GO:0005840	GO	ribosome
Thupl.1448551s0001	GO:0005622	GO	intracellular
Thupl.1448551s0001	GO:0003735	GO	structural constituent of ribosome
Thupl.1448551s0001	GO:0003723	GO	RNA binding
Thupl.1448551s0001	PTHR10871	PANTHER	30S RIBOSOMAL PROTEIN S13/40S RIBOSOMAL PROTEIN S18
Thupl.1448551s0001	GO:0006412	GO	translation
Thupl.1448551s0001	PF00416	PFAM	Ribosomal protein S13/S18
Thupl.1448551s0001	K02952	KEGGORTH	small subunit ribosomal protein S13
Thupl.1448551s0001	KOG3311	KOG	Ribosomal protein S18
Thupl.1448551s0002	PF00329	PFAM	Respiratory-chain NADH dehydrogenase, 30 Kd subunit
Thupl.1448551s0002	PTHR10884:SF10	PANTHER
Thupl.1448551s0002	GO:0055114	GO	oxidation-reduction process
Thupl.1448551s0002	KOG1713	KOG	NADH-ubiquinone oxidoreductase, NDUFS3/30 kDa subunit
Thupl.1448551s0002	1.6.99.3	EC	NADH dehydrogenase.
Thupl.1448551s0002	GO:0008137	GO	NADH dehydrogenase (ubiquinone) activity
Thupl.1448551s0002	PTHR10884	PANTHER	NADH DEHYDROGENASE [UBIQUINONE] IRON-SULFUR PROTEIN 3
Thupl.1448551s0002	K03936	KEGGORTH	NADH dehydrogenase (ubiquinone) Fe-S protein 3 [EC:1.6.5.3 1.6.99.3]
Thupl.1470223s0001	PTHR31852	PANTHER	FAMILY NOT NAMED
Thupl.1470223s0001	PTHR31852:SF3	PANTHER
Thupl.1470223s0001	PF03168	PFAM	Late embryogenesis abundant protein
Thupl.1480675s0001	PF00332	PFAM	Glycosyl hydrolases family 17
Thupl.1480675s0001	GO:0005975	GO	carbohydrate metabolic process
Thupl.1480675s0001	3.2.1.39	EC	Glucan endo-1,3-beta-D-glucosidase.
Thupl.1480675s0001	PTHR32227:SF230	PANTHER
Thupl.1480675s0001	GO:0004553	GO	hydrolase activity, hydrolyzing O-glycosyl compounds
Thupl.1480675s0001	PTHR32227	PANTHER	FAMILY NOT NAMED
Thupl.1512455s0001	GO:0055114	GO	oxidation-reduction process
Thupl.1512455s0001	PTHR24286	PANTHER	FAMILY NOT NAMED
Thupl.1512455s0001	GO:0005506	GO	iron ion binding
Thupl.1512455s0001	GO:0020037	GO	heme binding
Thupl.1512455s0001	GO:0016705	GO	oxidoreductase activity, acting on paired donors, with incorporation or reduction of molecular oxygen
Thupl.1512455s0001	PTHR24286:SF154	PANTHER
Thupl.1512455s0001	1.14.13.109	EC	Abieta-7,13-dien-18-ol hydroxylase.
Thupl.1512455s0001	PF00067	PFAM	Cytochrome P450
Thupl.15130917s0001	PTHR22893:SF88	PANTHER
Thupl.15130917s0001	GO:0010181	GO	FMN binding
Thupl.15130917s0001	1.3.1.42	EC	12-oxophytodienoate reductase.
Thupl.15130917s0001	GO:0016491	GO	oxidoreductase activity
Thupl.15130917s0001	PTHR22893	PANTHER	NADH OXIDOREDUCTASE-RELATED
Thupl.15130917s0001	GO:0055114	GO	oxidation-reduction process
Thupl.15130917s0001	PF00724	PFAM	NADH:flavin oxidoreductase / NADH oxidase family
Thupl.1555496s0001	GO:0006468	GO	protein phosphorylation
Thupl.1555496s0001	PTHR27007	PANTHER
Thupl.1555496s0001	GO:0005524	GO	ATP binding
Thupl.1555496s0001	PF00069	PFAM	Protein kinase domain
Thupl.1555496s0001	GO:0030246	GO	carbohydrate binding
Thupl.1555496s0001	KOG1187	KOG	Serine/threonine protein kinase
Thupl.1555496s0001	PTHR27007:SF71	PANTHER
Thupl.1555496s0001	2.7.11.1	EC	Non-specific serine/threonine protein kinase.
Thupl.1555496s0001	PF00139	PFAM	Legume lectin domain
Thupl.1555496s0001	GO:0004672	GO	protein kinase activity
Thupl.1562266s0001	PTHR23155	PANTHER	LEUCINE-RICH REPEAT-CONTAINING PROTEIN
Thupl.15776851s0001	PTHR11654	PANTHER	OLIGOPEPTIDE TRANSPORTER-RELATED
Thupl.15776851s0001	PTHR11654:SF78	PANTHER
Thupl.15776851s0001	GO:0005215	GO	transporter activity
Thupl.15776851s0001	3.6.3.26	EC	Nitrate-transporting ATPase.
Thupl.15776851s0001	GO:0006810	GO	transport
Thupl.15776851s0001	GO:0016020	GO	membrane
Thupl.1608627s0001	PTHR31374	PANTHER	FAMILY NOT NAMED
Thupl.1608627s0001	PF02519	PFAM	Auxin responsive protein
Thupl.1608627s0001	GO:0009733	GO	response to auxin stimulus
Thupl.1665926s0001	GO:0006511	GO	ubiquitin-dependent protein catabolic process
Thupl.1665926s0001	PF03152	PFAM	Ubiquitin fusion degradation protein UFD1
Thupl.1665926s0001	PTHR12555	PANTHER	UBIQUITIN FUSION DEGRADATON PROTEIN 1
Thupl.1665926s0001	PTHR12555:SF14	PANTHER
Thupl.1665926s0001	KOG1816	KOG	Ubiquitin fusion-degradation protein
Thupl.1889142s0001	GO:0005840	GO	ribosome
Thupl.1889142s0001	GO:0003735	GO	structural constituent of ribosome
Thupl.1889142s0001	GO:0005622	GO	intracellular
Thupl.1889142s0001	GO:0006412	GO	translation
Thupl.1889142s0001	PF01245	PFAM	Ribosomal protein L19
Thupl.1889142s0001	PTHR15680	PANTHER	RIBOSOMAL PROTEIN L19
Thupl.198542s0001	PTHR23172:SF54	PANTHER
Thupl.198542s0001	PTHR23172	PANTHER	AUXILIN/CYCLIN G-ASSOCIATED KINASE-RELATED
Thupl.1985678s0001	PTHR43507	PANTHER
Thupl.1985678s0001	GO:0008137	GO	NADH dehydrogenase (ubiquinone) activity
Thupl.1985678s0001	GO:0042773	GO	ATP synthesis coupled electron transport
Thupl.1985678s0001	1.6.5.3	EC	NADH:ubiquinone reductase (H(+)-translocating).
Thupl.1985678s0001	GO:0055114	GO	oxidation-reduction process
Thupl.1985678s0001	PTHR43507:SF6	PANTHER
Thupl.2023073s0001	PF03878	PFAM	YIF1
Thupl.2023073s0001	PTHR14083	PANTHER	YIP1 INTERACTING FACTOR HOMOLOG (YIF1 PROTEIN)
Thupl.2023073s0001	PTHR14083:SF6	PANTHER
Thupl.206752s0001	GO:0046983	GO	protein dimerization activity
Thupl.206752s0001	PF00010	PFAM	Helix-loop-helix DNA-binding domain
Thupl.206752s0001	PTHR31945	PANTHER	FAMILY NOT NAMED
Thupl.206752s0001	PTHR31945:SF2	PANTHER
Thupl.2098195s0001	PTHR31374:SF56	PANTHER
Thupl.2098195s0001	PTHR31374	PANTHER	FAMILY NOT NAMED
Thupl.2098195s0001	PF02519	PFAM	Auxin responsive protein
Thupl.2098195s0001	GO:0009733	GO	response to auxin stimulus
Thupl.2133774s0001	PTHR10098:SF111	PANTHER
Thupl.2133774s0001	PTHR10098	PANTHER	RAPSYN-RELATED
Thupl.2189450s0001	PF02298	PFAM	Plastocyanin-like domain
Thupl.2189450s0001	GO:0009055	GO	electron carrier activity
Thupl.2189450s0001	PTHR33021:SF143	PANTHER
Thupl.2189450s0001	PTHR33021	PANTHER
Thupl.2193621s0001	4.4.1.11	EC	Methionine gamma-lyase.
Thupl.2193621s0001	PTHR11808:SF15	PANTHER	CYSTATHIONINE GAMMA-LYASE (GAMMA-CYSTATHIONASE)
Thupl.2193621s0001	K01761	KEGGORTH	methionine-gamma-lyase [EC:4.4.1.11]
Thupl.2193621s0001	PF01053	PFAM	Cys/Met metabolism PLP-dependent enzyme
Thupl.2193621s0001	PTHR11808	PANTHER	TRANS-SULFURATION ENZYME FAMILY MEMBER
Thupl.2193621s0001	GO:0030170	GO	pyridoxal phosphate binding
Thupl.2193621s0001	KOG0053	KOG	Cystathionine beta-lyases/cystathionine gamma-synthases
Thupl.2206484s0001	PTHR27003:SF248	PANTHER
Thupl.2206484s0001	GO:0006468	GO	protein phosphorylation
Thupl.2206484s0001	KOG1187	KOG	Serine/threonine protein kinase
Thupl.2206484s0001	PTHR27003	PANTHER
Thupl.2206484s0001	GO:0004672	GO	protein kinase activity
Thupl.2206484s0001	PF07714	PFAM	Protein tyrosine kinase
Thupl.2206484s0001	2.7.11.1	EC	Non-specific serine/threonine protein kinase.
Thupl.236525s0001	K13679	KEGGORTH	granule-bound starch synthase [EC:2.4.1.242]
Thupl.236525s0001	PTHR12526	PANTHER	GLYCOSYLTRANSFERASE
Thupl.236525s0001	PTHR12526:SF383	PANTHER
Thupl.236525s0001	PF00534	PFAM	Glycosyl transferases group 1
Thupl.236525s0001	PF08323	PFAM	Starch synthase catalytic domain
Thupl.236525s0001	2.4.1.242	EC	NDP-glucose--starch glucosyltransferase.
Thupl.2419904s0001	PF10604	PFAM	Polyketide cyclase / dehydrase and lipid transport
Thupl.2419904s0001	PTHR31213	PANTHER	FAMILY NOT NAMED
Thupl.2419904s0001	K14496	KEGGORTH	abscisic acid receptor PYR/PYL family
Thupl.2419904s0001	PTHR31213:SF4	PANTHER
Thupl.2718944s0001	PF10469	PFAM	AKAP7 2'5' RNA ligase-like domain
Thupl.28133019s0001	PTHR32387:SF0	PANTHER	SUBFAMILY NOT NAMED
Thupl.28133019s0001	PTHR32387	PANTHER	FAMILY NOT NAMED
Thupl.28134086s0001	PTHR24298	PANTHER	FAMILY NOT NAMED
Thupl.28134086s0001	PF00067	PFAM	Cytochrome P450
Thupl.28134086s0001	1.14.13.152	EC	Geraniol 8-hydroxylase.
Thupl.28134086s0001	GO:0005506	GO	iron ion binding
Thupl.28134086s0001	GO:0055114	GO	oxidation-reduction process
Thupl.28134086s0001	PTHR24298:SF196	PANTHER
Thupl.28134086s0001	GO:0016705	GO	oxidoreductase activity, acting on paired donors, with incorporation or reduction of molecular oxygen
Thupl.28134086s0001	GO:0020037	GO	heme binding
Thupl.28134355s0001	GO:0030247	GO	polysaccharide binding
Thupl.28134355s0001	PF13947	PFAM	Wall-associated receptor kinase galacturonan-binding
Thupl.28134355s0001	PTHR33138	PANTHER
Thupl.28134789s0001	2.7.11.1	EC	Non-specific serine/threonine protein kinase.
Thupl.28134939s0001	PTHR36888	PANTHER
Thupl.28135010s0001	GO:0043531	GO	ADP binding
Thupl.28135010s0001	PTHR11017	PANTHER	LEUCINE-RICH REPEAT-CONTAINING PROTEIN
Thupl.28135010s0001	PF00931	PFAM	NB-ARC domain
Thupl.28135187s0001	PF13837	PFAM	Myb/SANT-like DNA-binding domain
Thupl.28135187s0001	PTHR33492	PANTHER
Thupl.28135187s0001	PTHR33492:SF2	PANTHER
Thupl.28135302s0001	PTHR42825	PANTHER
Thupl.28135302s0001	PF01063	PFAM	Aminotransferase class IV
Thupl.28135302s0001	GO:0003824	GO	catalytic activity
Thupl.28135302s0001	2.6.1.88	EC	Methionine transaminase.
Thupl.28135302s0001	GO:0008152	GO	metabolic process
Thupl.28135302s0001	PTHR42825:SF3	PANTHER
Thupl.28136652s0001	GO:0005515	GO	protein binding
Thupl.28136652s0001	KOG0406	KOG	Glutathione S-transferase
Thupl.28136652s0001	K00799	KEGGORTH	glutathione S-transferase [EC:2.5.1.18]
Thupl.28136652s0001	PTHR11260	PANTHER	GLUTATHIONE S-TRANSFERASE, GST, SUPERFAMILY, GST DOMAIN CONTAINING
Thupl.28136652s0001	2.5.1.18	EC	Glutathione transferase.
Thupl.28136652s0001	PF02798	PFAM	Glutathione S-transferase, N-terminal domain
Thupl.28136652s0001	PF00043	PFAM	Glutathione S-transferase, C-terminal domain
Thupl.28136675s0001	PTHR31945:SF15	PANTHER
Thupl.28136675s0001	PTHR31945	PANTHER	FAMILY NOT NAMED
Thupl.28136675s0001	PF00010	PFAM	Helix-loop-helix DNA-binding domain
Thupl.28136675s0001	GO:0046983	GO	protein dimerization activity
Thupl.28137510s0001	GO:0048038	GO	quinone binding
Thupl.28137510s0001	PTHR11993:SF10	PANTHER	NADH-UBIQUINONE OXIDOREDUCTASE 49 KDA SUBUNIT
Thupl.28137510s0001	1.6.99.3	EC	NADH dehydrogenase.
Thupl.28137510s0001	PTHR11993	PANTHER	NADH-UBIQUINONE OXIDOREDUCTASE 49 KDA SUBUNIT
Thupl.28137510s0001	GO:0016651	GO	oxidoreductase activity, acting on NAD(P)H
Thupl.28137510s0001	KOG2870	KOG	NADH:ubiquinone oxidoreductase, NDUFS2/49 kDa subunit
Thupl.28137510s0001	K03935	KEGGORTH	NADH dehydrogenase (ubiquinone) Fe-S protein 2 [EC:1.6.5.3 1.6.99.3]
Thupl.28137510s0001	GO:0055114	GO	oxidation-reduction process
Thupl.28137510s0001	PF00346	PFAM	Respiratory-chain NADH dehydrogenase, 49 Kd subunit
Thupl.28137510s0001	GO:0051287	GO	NAD binding
Thupl.28137557s0001	GO:0030246	GO	carbohydrate binding
Thupl.28137557s0001	PF00069	PFAM	Protein kinase domain
Thupl.28137557s0001	SignalP-noTM	SIGNALP
Thupl.28137557s0001	PF00139	PFAM	Legume lectin domain
Thupl.28137557s0001	GO:0004672	GO	protein kinase activity
Thupl.28137557s0001	2.7.11.1	EC	Non-specific serine/threonine protein kinase.
Thupl.28137557s0001	GO:0006468	GO	protein phosphorylation
Thupl.28137557s0001	PTHR27007:SF75	PANTHER
Thupl.28137557s0001	GO:0005524	GO	ATP binding
Thupl.28137557s0001	PTHR27007	PANTHER
Thupl.28137572s0001	SignalP-noTM	SIGNALP
Thupl.28137572s0001	PTHR31236	PANTHER	FAMILY NOT NAMED
Thupl.28137572s0001	PF03181	PFAM	BURP domain
Thupl.28137572s0001	PTHR31236:SF2	PANTHER
Thupl.28138376s0001	PF00182	PFAM	Chitinase class I
Thupl.28138376s0001	3.2.1.14	EC	Chitinase.
Thupl.28138376s0001	GO:0006032	GO	chitin catabolic process
Thupl.28138376s0001	GO:0004568	GO	chitinase activity
Thupl.28138376s0001	GO:0016998	GO	cell wall macromolecule catabolic process
Thupl.28138376s0001	PTHR22595:SF104	PANTHER
Thupl.28138376s0001	PTHR22595	PANTHER	CHITINASE-RELATED
Thupl.28140327s0001	PF14009	PFAM	Domain of unknown function (DUF4228)
Thupl.28140327s0001	PTHR33052	PANTHER
Thupl.28140327s0001	PTHR33052:SF21	PANTHER
Thupl.28140683s0001	PF00931	PFAM	NB-ARC domain
Thupl.28140683s0001	PTHR11017	PANTHER	LEUCINE-RICH REPEAT-CONTAINING PROTEIN
Thupl.28140683s0001	GO:0043531	GO	ADP binding
Thupl.28140959s0001	PF01582	PFAM	TIR domain
Thupl.28140959s0001	GO:0005515	GO	protein binding
Thupl.28140959s0001	PF00931	PFAM	NB-ARC domain
Thupl.28140959s0001	GO:0007165	GO	signal transduction
Thupl.28140959s0001	GO:0043531	GO	ADP binding
Thupl.28140959s0001	PTHR11017	PANTHER	LEUCINE-RICH REPEAT-CONTAINING PROTEIN
Thupl.28141392s0001	PTHR22773	PANTHER	NADH DEHYDROGENASE
Thupl.28141392s0001	1.6.5.3	EC	NADH:ubiquinone reductase (H(+)-translocating).
Thupl.28141392s0001	PTHR22773:SF102	PANTHER
Thupl.28141392s0001	PF00361	PFAM	NADH-Ubiquinone/plastoquinone (complex I), various chains
Thupl.28141945s0001	PF00931	PFAM	NB-ARC domain
Thupl.28141945s0001	PTHR43886	PANTHER
Thupl.28141945s0001	GO:0043531	GO	ADP binding
Thupl.28141945s0002	GO:0005515	GO	protein binding
Thupl.28141945s0002	PTHR43886	PANTHER
Thupl.28141945s0002	PF13855	PFAM	Leucine rich repeat
Thupl.28143895s0001	PF00201	PFAM	UDP-glucoronosyl and UDP-glucosyl transferase
Thupl.28143895s0001	2.4.1.115	EC	Anthocyanidin 3-O-glucosyltransferase.
Thupl.28143895s0001	PTHR11926	PANTHER	GLUCOSYL/GLUCURONOSYL TRANSFERASES
Thupl.28143895s0001	KOG1192	KOG	UDP-glucuronosyl and UDP-glucosyl transferase
Thupl.28143895s0001	PTHR11926:SF458	PANTHER
Thupl.28143895s0001	GO:0016758	GO	transferase activity, transferring hexosyl groups
Thupl.28143895s0001	GO:0008152	GO	metabolic process
Thupl.28144677s0001	GO:0043531	GO	ADP binding
Thupl.28144677s0001	PF13855	PFAM	Leucine rich repeat
Thupl.28144677s0001	PTHR43886	PANTHER
Thupl.28144677s0001	PF00931	PFAM	NB-ARC domain
Thupl.28144677s0001	GO:0005515	GO	protein binding
Thupl.28144677s0001	KOG4658	KOG	Apoptotic ATPase
Thupl.28144815s0001	SignalP-noTM	SIGNALP
Thupl.28144815s0001	PF01476	PFAM	LysM domain
Thupl.28144815s0001	PTHR33734:SF6	PANTHER
Thupl.28144815s0001	2.7.11.1	EC	Non-specific serine/threonine protein kinase.
Thupl.28144815s0001	PTHR33734	PANTHER
Thupl.28145133s0001	GO:0055114	GO	oxidation-reduction process
Thupl.28145133s0001	K03882	KEGGORTH	NADH dehydrogenase I subunit 4L [EC:1.6.5.3]
Thupl.28145133s0001	PF00420	PFAM	NADH-ubiquinone/plastoquinone oxidoreductase chain 4L
Thupl.28145133s0001	PTHR11434:SF5	PANTHER
Thupl.28145133s0001	KOG4669	KOG	NADH dehydrogenase subunit 4L and related proteins
Thupl.28145133s0001	PTHR11434	PANTHER	NADH-UBIQUINONE OXIDOREDUCTASE SUBUNIT ND4L
Thupl.28145133s0001	GO:0042773	GO	ATP synthesis coupled electron transport
Thupl.28145133s0001	GO:0016651	GO	oxidoreductase activity, acting on NAD(P)H
Thupl.28145133s0001	1.6.5.3	EC	NADH:ubiquinone reductase (H(+)-translocating).
Thupl.28147002s0001	PF12854	PFAM	PPR repeat
Thupl.28148488s0001	PTHR11863:SF98	PANTHER
Thupl.28148488s0001	PF12076	PFAM	WAX2 C-terminal domain
Thupl.28148488s0001	PTHR11863	PANTHER	STEROL DESATURASE
Thupl.28149078s0001	2.4.1.43	EC	Polygalacturonate 4-alpha-galacturonosyltransferase.
Thupl.28149078s0001	GO:0016757	GO	transferase activity, transferring glycosyl groups
Thupl.28149078s0001	PTHR32116	PANTHER	FAMILY NOT NAMED
Thupl.28149078s0001	PF01501	PFAM	Glycosyl transferase family 8
Thupl.28149078s0001	GO:0047262	GO	polygalacturonate 4-alpha-galacturonosyltransferase activity
Thupl.28149078s0001	PTHR32116:SF2	PANTHER	SUBFAMILY NOT NAMED
Thupl.28149078s0002	3.2.1.21	EC	Beta-glucosidase.
Thupl.28150147s0001	PF03171	PFAM	2OG-Fe(II) oxygenase superfamily
Thupl.28150147s0001	KOG0143	KOG	Iron/ascorbate family oxidoreductases
Thupl.28150147s0001	GO:0055114	GO	oxidation-reduction process
Thupl.28150147s0001	PTHR10209:SF382	PANTHER
Thupl.28150147s0001	GO:0016491	GO	oxidoreductase activity
Thupl.28150147s0001	PTHR10209	PANTHER	OXIDOREDUCTASE, 2OG-FE(II) OXYGENASE FAMILY PROTEIN
Thupl.28150147s0001	1.14.11.19	EC	Leucocyanidin oxygenase.
Thupl.28151646s0001	GO:0006355	GO	regulation of transcription, DNA-dependent
Thupl.28151646s0001	PF00847	PFAM	AP2 domain
Thupl.28151646s0001	GO:0003700	GO	sequence-specific DNA binding transcription factor activity
Thupl.28151646s0001	PTHR31985:SF77	PANTHER
Thupl.28151646s0001	PTHR31985	PANTHER	FAMILY NOT NAMED
Thupl.28151792s0001	PTHR35286	PANTHER
Thupl.28152024s0001	4.3.3.2	EC	Strictosidine synthase.
Thupl.28152024s0001	GO:0009058	GO	biosynthetic process
Thupl.28152024s0001	GO:0016844	GO	strictosidine synthase activity
Thupl.28152024s0001	PF03088	PFAM	Strictosidine synthase
Thupl.28152024s0001	PTHR10426	PANTHER	STRICTOSIDINE SYNTHASE-RELATED
Thupl.28152553s0001	PTHR43507	PANTHER
Thupl.28152553s0001	GO:0008137	GO	NADH dehydrogenase (ubiquinone) activity
Thupl.28152553s0001	PTHR43507:SF3	PANTHER
Thupl.28152553s0001	GO:0016655	GO	oxidoreductase activity, acting on NAD(P)H, quinone or similar compound as acceptor
Thupl.28152553s0001	GO:0042773	GO	ATP synthesis coupled electron transport
Thupl.28152553s0001	KOG4668	KOG	NADH dehydrogenase subunits 2, 5, and related proteins
Thupl.28152553s0001	GO:0055114	GO	oxidation-reduction process
Thupl.28152553s0001	K05575	KEGGORTH	NADH dehydrogenase I subunit 4 [EC:1.6.5.3]
Thupl.28152553s0001	PF00361	PFAM	NADH-Ubiquinone/plastoquinone (complex I), various chains
Thupl.28152789s0001	PF08787	PFAM	Alginate lyase
Thupl.28152789s0001	SignalP-noTM	SIGNALP
Thupl.28152789s0001	PTHR33681	PANTHER
Thupl.28153607s0001	K05674	KEGGORTH	ATP-binding cassette, subfamily C (CFTR/MRP), member 10
Thupl.28153607s0001	PF00005	PFAM	ABC transporter
Thupl.28153607s0001	GO:0005524	GO	ATP binding
Thupl.28153607s0001	PTHR24223:SF330	PANTHER
Thupl.28153607s0001	GO:0016887	GO	ATPase activity
Thupl.28153607s0001	3.6.3.44	EC	Xenobiotic-transporting ATPase.
Thupl.28153607s0001	PTHR24223	PANTHER	FAMILY NOT NAMED
Thupl.28153775s0001	PTHR31549	PANTHER	FAMILY NOT NAMED
Thupl.28153775s0001	PF03140	PFAM	Plant protein of unknown function
Thupl.28154036s0001	GO:0003677	GO	DNA binding
Thupl.28154036s0001	K11253	KEGGORTH	histone H3
Thupl.28154036s0001	GO:0000786	GO	nucleosome
Thupl.28154036s0001	PTHR11426:SF165	PANTHER
Thupl.28154036s0001	PTHR11426	PANTHER	HISTONE H3
Thupl.28154461s0001	PTHR31650	PANTHER	FAMILY NOT NAMED
Thupl.28154461s0001	PTHR31650:SF7	PANTHER
Thupl.28154461s0001	PF06974	PFAM	Protein of unknown function (DUF1298)
Thupl.28154461s0001	2.3.1.20	EC	Diacylglycerol O-acyltransferase.
Thupl.28154461s0001	GO:0004144	GO	diacylglycerol O-acyltransferase activity
Thupl.28155302s0001	PTHR33077	PANTHER
Thupl.28155302s0001	PTHR33077:SF13	PANTHER
Thupl.28155302s0001	PF09425	PFAM	Divergent CCT motif
Thupl.28155302s0001	PF06200	PFAM	tify domain
Thupl.28155907s0001	3.4.23.12	EC	Nepenthesin.
Thupl.28155907s0001	PTHR13683	PANTHER	ASPARTYL PROTEASES
Thupl.28155907s0001	PF14543	PFAM	Xylanase inhibitor N-terminal
Thupl.28155907s0001	GO:0006508	GO	proteolysis
Thupl.28155907s0001	GO:0004190	GO	aspartic-type endopeptidase activity
Thupl.28155907s0001	PF14541	PFAM	Xylanase inhibitor C-terminal
Thupl.28155907s0001	PTHR13683:SF223	PANTHER
Thupl.28156316s0001	3.6.4.12	EC	DNA helicase.
Thupl.28156316s0001	PTHR23274	PANTHER	DNA HELICASE-RELATED
Thupl.28156316s0001	PTHR23274:SF11	PANTHER
Thupl.28157064s0001	PTHR43930	PANTHER
Thupl.28157064s0001	PF13306	PFAM	Leucine rich repeats (6 copies)
Thupl.28157347s0001	PTHR16223	PANTHER	FAMILY NOT NAMED
Thupl.28157347s0001	GO:0046983	GO	protein dimerization activity
Thupl.28157347s0001	PF00010	PFAM	Helix-loop-helix DNA-binding domain
Thupl.28157347s0001	PTHR16223:SF69	PANTHER
Thupl.28157525s0001	PF05032	PFAM	Spo12 family
Thupl.28157525s0001	PTHR36747	PANTHER
Thupl.28158589s0001	PTHR31168	PANTHER	FAMILY NOT NAMED
Thupl.28158589s0001	PF04654	PFAM	Protein of unknown function, DUF599
Thupl.28158668s0001	K13459	KEGGORTH	disease resistance protein RPS2
Thupl.28158668s0001	PTHR43906	PANTHER
Thupl.28158668s0002	PTHR43930	PANTHER
Thupl.28159346s0001	2.7.11.1	EC	Non-specific serine/threonine protein kinase.
Thupl.28159346s0001	GO:0004672	GO	protein kinase activity
Thupl.28159346s0001	PTHR27009	PANTHER
Thupl.28159346s0001	PF00069	PFAM	Protein kinase domain
Thupl.28159346s0001	KOG1187	KOG	Serine/threonine protein kinase
Thupl.28159346s0001	GO:0005524	GO	ATP binding
Thupl.28159346s0001	K04733	KEGGORTH	interleukin-1 receptor-associated kinase 4 [EC:2.7.11.1]
Thupl.28159346s0001	GO:0006468	GO	protein phosphorylation
Thupl.28161031s0001	PTHR12131:SF6	PANTHER
Thupl.28161031s0001	3.6.4.13	EC	RNA helicase.
Thupl.28161031s0001	PTHR12131	PANTHER	ATP-DEPENDENT RNA AND DNA HELICASE
Thupl.28161512s0001	PF02458	PFAM	Transferase family
Thupl.28161512s0001	GO:0016747	GO	transferase activity, transferring acyl groups other than amino-acyl groups
Thupl.28161512s0001	PTHR31642:SF117	PANTHER
Thupl.28161512s0001	2.3.1.188	EC	Omega-hydroxypalmitate O-feruloyl transferase.
Thupl.28161512s0001	PTHR31642	PANTHER	FAMILY NOT NAMED
Thupl.28162147s0001	PF01048	PFAM	Phosphorylase superfamily
Thupl.28162147s0001	PTHR21234:SF19	PANTHER
Thupl.28162147s0001	PTHR21234	PANTHER	PURINE NUCLEOSIDE PHOSPHORYLASE
Thupl.28162147s0001	3.2.2.9	EC	Adenosylhomocysteine nucleosidase.
Thupl.28162147s0001	GO:0003824	GO	catalytic activity
Thupl.28162147s0001	GO:0009116	GO	nucleoside metabolic process
Thupl.28163155s0001	PTHR12609	PANTHER	MICROTUBULE ASSOCIATED PROTEIN XMAP215
Thupl.28163155s0001	PTHR12609:SF0	PANTHER	SUBFAMILY NOT NAMED
Thupl.28163422s0001	SignalP-noTM	SIGNALP
Thupl.28163486s0001	PTHR10795:SF348	PANTHER
Thupl.28163486s0001	3.4.21.25	EC	Cucumisin.
Thupl.28163486s0001	PTHR10795	PANTHER	PROPROTEIN CONVERTASE SUBTILISIN/KEXIN
Thupl.28164589s0001	GO:0004672	GO	protein kinase activity
Thupl.28164589s0001	2.7.11.1	EC	Non-specific serine/threonine protein kinase.
Thupl.28164589s0001	PF07714	PFAM	Protein tyrosine kinase
Thupl.28164589s0001	PTHR27003	PANTHER
Thupl.28164589s0001	GO:0006468	GO	protein phosphorylation
Thupl.28164589s0001	PTHR27003:SF248	PANTHER
Thupl.28165334s0001	PTHR11017	PANTHER	LEUCINE-RICH REPEAT-CONTAINING PROTEIN
Thupl.28165334s0001	GO:0043531	GO	ADP binding
Thupl.28165334s0001	PF00931	PFAM	NB-ARC domain
Thupl.28165471s0001	PTHR33681	PANTHER
Thupl.28166317s0001	2.6.1.42	EC	Branched-chain-amino-acid transaminase.
Thupl.28166317s0001	PTHR42825:SF3	PANTHER
Thupl.28166317s0001	PTHR42825	PANTHER
Thupl.28167246s0001	PTHR10183:SF372	PANTHER
Thupl.28167246s0001	PF13405	PFAM	EF-hand domain
Thupl.28167246s0001	PTHR10183	PANTHER	CALPAIN
Thupl.28167246s0001	GO:0005509	GO	calcium ion binding
Thupl.28167493s0001	PTHR11527	PANTHER	SMALL HEAT-SHOCK PROTEIN (HSP20) FAMILY
Thupl.28167493s0001	KOG3591	KOG	Alpha crystallins
Thupl.28167493s0001	PF00011	PFAM	Hsp20/alpha crystallin family
Thupl.28167493s0001	PTHR11527:SF241	PANTHER
Thupl.28167823s0001	GO:0055114	GO	oxidation-reduction process
Thupl.28167823s0001	PTHR10209:SF212	PANTHER
Thupl.28167823s0001	KOG0143	KOG	Iron/ascorbate family oxidoreductases
Thupl.28167823s0001	PF03171	PFAM	2OG-Fe(II) oxygenase superfamily
Thupl.28167823s0001	PTHR10209	PANTHER	OXIDOREDUCTASE, 2OG-FE(II) OXYGENASE FAMILY PROTEIN
Thupl.28167823s0001	PF14226	PFAM	non-haem dioxygenase in morphine synthesis N-terminal
Thupl.28167823s0001	GO:0016491	GO	oxidoreductase activity
Thupl.28168833s0001	GO:0005524	GO	ATP binding
Thupl.28168833s0001	GO:0005515	GO	protein binding
Thupl.28168833s0001	GO:0006468	GO	protein phosphorylation
Thupl.28168833s0001	2.7.11.1	EC	Non-specific serine/threonine protein kinase.
Thupl.28168833s0001	GO:0004672	GO	protein kinase activity
Thupl.28168833s0001	PTHR43887	PANTHER
Thupl.28168833s0001	PF13855	PFAM	Leucine rich repeat
Thupl.28168833s0001	PF00069	PFAM	Protein kinase domain
Thupl.28168833s0001	KOG1187	KOG	Serine/threonine protein kinase
Thupl.28169057s0001	GO:0005515	GO	protein binding
Thupl.28169057s0001	PF01582	PFAM	TIR domain
Thupl.28169057s0001	PTHR44577	PANTHER
Thupl.28169057s0001	GO:0007165	GO	signal transduction
Thupl.28170157s0001	PF03140	PFAM	Plant protein of unknown function
Thupl.28170157s0001	PTHR31549:SF23	PANTHER
Thupl.28170157s0001	PTHR31549	PANTHER	FAMILY NOT NAMED
Thupl.28170184s0001	PF01095	PFAM	Pectinesterase
Thupl.28170184s0001	GO:0042545	GO	cell wall modification
Thupl.28170184s0001	3.1.1.11	EC	Pectinesterase.
Thupl.28170184s0001	GO:0004857	GO	enzyme inhibitor activity
Thupl.28170184s0001	GO:0030599	GO	pectinesterase activity
Thupl.28170184s0001	PTHR31707:SF25	PANTHER
Thupl.28170184s0001	PTHR31707	PANTHER	FAMILY NOT NAMED
Thupl.28170184s0001	PF04043	PFAM	Plant invertase/pectin methylesterase inhibitor
Thupl.28170184s0001	GO:0005618	GO	cell wall
Thupl.28170576s0001	2.7.7.49	EC	RNA-directed DNA polymerase.
Thupl.28170576s0001	PTHR45329	PANTHER
Thupl.28171844s0001	SignalP-noTM	SIGNALP
Thupl.28171844s0001	PF14845	PFAM	beta-acetyl hexosaminidase like
Thupl.28171844s0001	3.2.1.52	EC	Beta-N-acetylhexosaminidase.
Thupl.28171981s0001	PTHR13871	PANTHER	THIOREDOXIN
Thupl.28171981s0001	PF03107	PFAM	C1 domain
Thupl.28171981s0001	PTHR13871:SF33	PANTHER
Thupl.28172050s0001	GO:0005515	GO	protein binding
Thupl.28172050s0001	PF00931	PFAM	NB-ARC domain
Thupl.28172050s0001	PF01582	PFAM	TIR domain
Thupl.28172050s0001	GO:0043531	GO	ADP binding
Thupl.28172050s0001	PTHR11017	PANTHER	LEUCINE-RICH REPEAT-CONTAINING PROTEIN
Thupl.28172050s0001	GO:0007165	GO	signal transduction
Thupl.28172411s0001	SignalP-noTM	SIGNALP
Thupl.28172411s0001	3.6.3.44	EC	Xenobiotic-transporting ATPase.
Thupl.28172411s0001	PTHR24223	PANTHER	FAMILY NOT NAMED
Thupl.28172411s0001	PTHR24223:SF251	PANTHER
Thupl.28172604s0001	PTHR33052	PANTHER
Thupl.28172604s0001	PF14009	PFAM	Domain of unknown function (DUF4228)
Thupl.28172604s0001	PTHR33052:SF17	PANTHER
Thupl.28172885s0001	SignalP-noTM	SIGNALP
Thupl.28173112s0001	2.7.11.1	EC	Non-specific serine/threonine protein kinase.
Thupl.28173112s0001	PTHR27004	PANTHER
Thupl.28173715s0001	PTHR23336:SF18	PANTHER
Thupl.28173715s0001	PTHR23336	PANTHER	ZINC FINGER CW-TYPE COILED-COIL DOMAIN PROTEIN 3.
Thupl.28173715s0001	PF13589	PFAM	Histidine kinase-, DNA gyrase B-, and HSP90-like ATPase
Thupl.28174598s0001	PTHR43930	PANTHER
Thupl.28174843s0001	PF13855	PFAM	Leucine rich repeat
Thupl.28174843s0001	PTHR27004	PANTHER
Thupl.28174843s0001	PF00560	PFAM	Leucine Rich Repeat
Thupl.28174843s0001	2.7.11.1	EC	Non-specific serine/threonine protein kinase.
Thupl.28174843s0001	KOG4579	KOG	Leucine-rich repeat (LRR) protein associated with apoptosis in muscle tissue
Thupl.28174843s0001	GO:0005515	GO	protein binding
Thupl.28175437s0001	K16075	KEGGORTH
Thupl.28175437s0001	PTHR13890	PANTHER	RNA SPLICING PROTEIN MRS2, MITOCHONDRIAL
Thupl.28175437s0001	PTHR13890:SF11	PANTHER
Thupl.28176895s0001	PTHR11142:SF10	PANTHER
Thupl.28176895s0001	GO:0001522	GO	pseudouridine synthesis
Thupl.28176895s0001	GO:0009451	GO	RNA modification
Thupl.28176895s0001	GO:0003723	GO	RNA binding
Thupl.28176895s0001	GO:0009982	GO	pseudouridine synthase activity
Thupl.28176895s0001	PTHR11142	PANTHER	PSEUDOURIDYLATE SYNTHASE
Thupl.28178053s0001	PTHR27006:SF27	PANTHER
Thupl.28178053s0001	PTHR27006	PANTHER
Thupl.28179001s0001	PTHR31374:SF41	PANTHER
Thupl.28179001s0001	GO:0009733	GO	response to auxin stimulus
Thupl.28179001s0001	PTHR31374	PANTHER	FAMILY NOT NAMED
Thupl.28179001s0001	PF02519	PFAM	Auxin responsive protein
Thupl.28179328s0001	GO:0010223	GO	secondary shoot formation
Thupl.28179328s0001	GO:0005634	GO	nucleus
Thupl.28179328s0001	PTHR31636	PANTHER	FAMILY NOT NAMED
Thupl.28179328s0001	PF03514	PFAM	GRAS domain family
Thupl.28179328s0001	PTHR31636:SF2	PANTHER
Thupl.28179361s0001	PF07714	PFAM	Protein tyrosine kinase
Thupl.28179361s0001	2.7.11.1	EC	Non-specific serine/threonine protein kinase.
Thupl.28179361s0001	GO:0004672	GO	protein kinase activity
Thupl.28179361s0001	PTHR27003:SF248	PANTHER
Thupl.28179361s0001	PTHR27003	PANTHER
Thupl.28179361s0001	GO:0006468	GO	protein phosphorylation
Thupl.28179960s0001	PTHR11017	PANTHER	LEUCINE-RICH REPEAT-CONTAINING PROTEIN
Thupl.28179960s0001	GO:0007165	GO	signal transduction
Thupl.28179960s0001	GO:0005515	GO	protein binding
Thupl.28179960s0001	PF01582	PFAM	TIR domain
Thupl.28180720s0001	PTHR12321:SF53	PANTHER
Thupl.28180720s0001	PTHR12321	PANTHER	CPG BINDING PROTEIN
Thupl.28180841s0001	PTHR24223:SF330	PANTHER
Thupl.28180841s0001	PTHR24223	PANTHER	FAMILY NOT NAMED
Thupl.28180841s0001	GO:0016887	GO	ATPase activity
Thupl.28180841s0001	3.6.3.44	EC	Xenobiotic-transporting ATPase.
Thupl.28180841s0001	PF00005	PFAM	ABC transporter
Thupl.28180841s0001	GO:0005524	GO	ATP binding
Thupl.28181693s0001	PTHR22604:SF151	PANTHER
Thupl.28181693s0001	PTHR22604	PANTHER	OXIDOREDUCTASES
Thupl.28181824s0001	PTHR13878	PANTHER	GULONOLACTONE OXIDASE
Thupl.28181824s0001	PTHR13878:SF90	PANTHER
Thupl.28181824s0001	KOG4730	KOG	D-arabinono-1, 4-lactone oxidase
Thupl.28181824s0001	GO:0016020	GO	membrane
Thupl.28181824s0001	PF04030	PFAM	D-arabinono-1,4-lactone oxidase
Thupl.28181824s0001	1.1.3.8	EC	L-gulonolactone oxidase.
Thupl.28181824s0001	GO:0055114	GO	oxidation-reduction process
Thupl.28181824s0001	GO:0003885	GO	D-arabinono-1,4-lactone oxidase activity
Thupl.28182045s0001	PTHR11139	PANTHER	ATAXIA TELANGIECTASIA MUTATED (ATM)-RELATED
Thupl.28182045s0001	2.7.11.1	EC	Non-specific serine/threonine protein kinase.
Thupl.28182045s0001	PTHR11139:SF9	PANTHER	FKBP-RAPAMYCIN ASSOCIATED PROTEIN
Thupl.28182045s0001	GO:0004674	GO	protein serine/threonine kinase activity
Thupl.28182071s0001	PF06884	PFAM	Protein of unknown function (DUF1264)
Thupl.28182071s0001	PTHR31360:SF0	PANTHER	SUBFAMILY NOT NAMED
Thupl.28182071s0001	PTHR31360	PANTHER	FAMILY NOT NAMED
Thupl.28182934s0001	PF00332	PFAM	Glycosyl hydrolases family 17
Thupl.28182934s0001	GO:0005975	GO	carbohydrate metabolic process
Thupl.28182934s0001	3.2.1.39	EC	Glucan endo-1,3-beta-D-glucosidase.
Thupl.28182934s0001	PTHR32227	PANTHER	FAMILY NOT NAMED
Thupl.28182934s0001	GO:0004553	GO	hydrolase activity, hydrolyzing O-glycosyl compounds
Thupl.28182939s0001	SignalP-noTM	SIGNALP
Thupl.28183687s0001	PTHR10177:SF267	PANTHER
Thupl.28183687s0001	PTHR10177	PANTHER	CYCLINE
Thupl.28183687s0001	PF02984	PFAM	Cyclin, C-terminal domain
Thupl.28183687s0001	GO:0005634	GO	nucleus
Thupl.28183687s0001	KOG0653	KOG	Cyclin B and related kinase-activating proteins
Thupl.28183687s0001	PF00134	PFAM	Cyclin, N-terminal domain
Thupl.28183804s0001	GO:0016829	GO	lyase activity
Thupl.28183804s0001	PTHR31739	PANTHER	FAMILY NOT NAMED
Thupl.28183804s0001	GO:0010333	GO	terpene synthase activity
Thupl.28183804s0001	GO:0000287	GO	magnesium ion binding
Thupl.28183804s0001	4.2.3.18	EC	Abieta-7,13-diene synthase.
Thupl.28183804s0001	GO:0008152	GO	metabolic process
Thupl.28183804s0001	PF03936	PFAM	Terpene synthase family, metal binding domain
Thupl.28183804s0001	PF01397	PFAM	Terpene synthase, N-terminal domain
Thupl.28185928s0001	K04733	KEGGORTH	interleukin-1 receptor-associated kinase 4 [EC:2.7.11.1]
Thupl.28185928s0001	GO:0006468	GO	protein phosphorylation
Thupl.28185928s0001	KOG0580	KOG	Serine/threonine protein kinase
Thupl.28185928s0001	3.1.4.46	EC	Glycerophosphodiester phosphodiesterase.
Thupl.28185928s0001	PTHR27009	PANTHER
Thupl.28185928s0001	PF07714	PFAM	Protein tyrosine kinase
Thupl.28185928s0001	GO:0004672	GO	protein kinase activity
Thupl.28186827s0001	PF04678	PFAM	Protein of unknown function, DUF607
Thupl.28186905s0001	PTHR12616	PANTHER	VACUOLAR PROTEIN SORTING VPS41
Thupl.28186905s0001	PF12816	PFAM	Golgi CORVET complex core vacuolar protein 8
Thupl.28186905s0001	PTHR12616:SF8	PANTHER
Thupl.28187171s0001	PTHR16223	PANTHER	FAMILY NOT NAMED
Thupl.28187171s0001	PTHR16223:SF12	PANTHER
Thupl.28188178s0001	K10728	KEGGORTH	topoisomerase (DNA) II binding protein 1
Thupl.28188178s0001	PTHR13561	PANTHER	DNA REPLICATION REGULATOR DPB11-RELATED
Thupl.28188178s0001	PTHR13561:SF20	PANTHER
Thupl.28188178s0001	PF12738	PFAM	twin BRCT domain
Thupl.28188715s0001	PTHR31549	PANTHER	FAMILY NOT NAMED
Thupl.28188715s0001	PTHR31549:SF23	PANTHER
Thupl.28188715s0001	PF03140	PFAM	Plant protein of unknown function
Thupl.28189582s0001	PTHR31945:SF2	PANTHER
Thupl.28189582s0001	PF00010	PFAM	Helix-loop-helix DNA-binding domain
Thupl.28189582s0001	GO:0046983	GO	protein dimerization activity
Thupl.28189582s0001	PTHR31945	PANTHER	FAMILY NOT NAMED
Thupl.28190514s0001	GO:0006468	GO	protein phosphorylation
Thupl.28190514s0001	GO:0005524	GO	ATP binding
Thupl.28190514s0001	PF00069	PFAM	Protein kinase domain
Thupl.28190514s0001	PTHR27002	PANTHER
Thupl.28190514s0001	PTHR27002:SF150	PANTHER
Thupl.28190514s0001	2.7.11.1	EC	Non-specific serine/threonine protein kinase.
Thupl.28190514s0001	GO:0004672	GO	protein kinase activity
Thupl.28190704s0001	GO:0005515	GO	protein binding
Thupl.28190704s0001	PF08263	PFAM	Leucine rich repeat N-terminal domain
Thupl.28190704s0001	2.7.11.1	EC	Non-specific serine/threonine protein kinase.
Thupl.28190704s0001	PF00560	PFAM	Leucine Rich Repeat
Thupl.28190704s0001	PF13855	PFAM	Leucine rich repeat
Thupl.28190704s0001	PTHR45297	PANTHER
Thupl.28191117s0001	PTHR32487:SF0	PANTHER	SUBFAMILY NOT NAMED
Thupl.28191117s0001	1.3.1.3	EC	Delta(4)-3-oxosteroid 5-beta-reductase.
Thupl.28191117s0001	PF01370	PFAM	NAD dependent epimerase/dehydratase family
Thupl.28191117s0001	PTHR32487	PANTHER	FAMILY NOT NAMED
Thupl.28191117s0001	GO:0003824	GO	catalytic activity
Thupl.28191117s0001	GO:0050662	GO	coenzyme binding
Thupl.28192406s0001	PTHR45002	PANTHER
Thupl.28192406s0001	GO:0005515	GO	protein binding
Thupl.28192406s0001	PF13855	PFAM	Leucine rich repeat
Thupl.28192406s0001	2.7.11.1	EC	Non-specific serine/threonine protein kinase.
Thupl.28192747s0001	PF05199	PFAM	GMC oxidoreductase
Thupl.28192747s0001	PTHR11552:SF82	PANTHER
Thupl.28192747s0001	GO:0016614	GO	oxidoreductase activity, acting on CH-OH group of donors
Thupl.28192747s0001	GO:0055114	GO	oxidation-reduction process
Thupl.28192747s0001	PTHR11552	PANTHER	GLUCOSE-METHANOL-CHOLINE (GMC) OXIDOREDUCTASE
Thupl.28194507s0001	PF13639	PFAM	Ring finger domain
Thupl.28194507s0001	PTHR22937	PANTHER	RING FINGER CONTAINING PROTEIN
Thupl.28194507s0001	PTHR22937:SF77	PANTHER
Thupl.28194507s0001	KOG1493	KOG	Anaphase-promoting complex (APC), subunit 11
Thupl.28194832s0001	SignalP-noTM	SIGNALP
Thupl.28195673s0001	GO:0009733	GO	response to auxin stimulus
Thupl.28195673s0001	PTHR31374	PANTHER	FAMILY NOT NAMED
Thupl.28195673s0001	PF02519	PFAM	Auxin responsive protein
Thupl.28195673s0001	PTHR31374:SF22	PANTHER
Thupl.28197221s0001	GO:0009733	GO	response to auxin stimulus
Thupl.28197221s0001	PTHR31374	PANTHER	FAMILY NOT NAMED
Thupl.28197221s0001	PF02519	PFAM	Auxin responsive protein
Thupl.28197221s0001	PTHR31374:SF35	PANTHER
Thupl.28197426s0001	GO:0008171	GO	O-methyltransferase activity
Thupl.28197426s0001	PTHR11746	PANTHER	O-METHYLTRANSFERASE
Thupl.28197426s0001	PF08100	PFAM	Dimerisation domain
Thupl.28197426s0001	2.1.1.68	EC	Caffeate O-methyltransferase.
Thupl.28197426s0001	PF00891	PFAM	O-methyltransferase
Thupl.28197426s0001	GO:0046983	GO	protein dimerization activity
Thupl.28198062s0001	PTHR10209	PANTHER	OXIDOREDUCTASE, 2OG-FE(II) OXYGENASE FAMILY PROTEIN
Thupl.28198062s0001	PTHR10209:SF382	PANTHER
Thupl.28198062s0001	GO:0016491	GO	oxidoreductase activity
Thupl.28198062s0001	GO:0055114	GO	oxidation-reduction process
Thupl.28198062s0001	PF03171	PFAM	2OG-Fe(II) oxygenase superfamily
Thupl.28198062s0001	1.14.11.19	EC	Leucocyanidin oxygenase.
Thupl.28198095s0001	PF13041	PFAM	PPR repeat family
Thupl.28198095s0001	PTHR24015	PANTHER	FAMILY NOT NAMED
Thupl.28198095s0001	PTHR24015:SF535	PANTHER
Thupl.28198095s0001	PF01535	PFAM	PPR repeat
Thupl.28198917s0001	GO:0055114	GO	oxidation-reduction process
Thupl.28198917s0001	GO:0050660	GO	flavin adenine dinucleotide binding
Thupl.28198917s0001	GO:0016491	GO	oxidoreductase activity
Thupl.28198917s0001	1.3.3.8	EC	Tetrahydroberberine oxidase.
Thupl.28198917s0001	PF01565	PFAM	FAD binding domain
Thupl.28198917s0001	PTHR32448	PANTHER	FAMILY NOT NAMED
Thupl.28199166s0001	GO:0055085	GO	transmembrane transport
Thupl.28199166s0001	GO:0005524	GO	ATP binding
Thupl.28199166s0001	PTHR24223:SF251	PANTHER
Thupl.28199166s0001	GO:0006810	GO	transport
Thupl.28199166s0001	GO:0042626	GO	ATPase activity, coupled to transmembrane movement of substances
Thupl.28199166s0001	GO:0016021	GO	integral to membrane
Thupl.28199166s0001	PF00664	PFAM	ABC transporter transmembrane region
Thupl.28199166s0001	3.6.3.44	EC	Xenobiotic-transporting ATPase.
Thupl.28199166s0001	PTHR24223	PANTHER	FAMILY NOT NAMED
Thupl.28200142s0001	PTHR12858:SF2	PANTHER	RIBOSOME BIOGENESIS PROTEIN BMS1
Thupl.28200142s0001	PTHR12858	PANTHER	RIBOSOME BIOGENESIS PROTEIN
Thupl.28200440s0001	3.4.16.2	EC	Lysosomal Pro-Xaa carboxypeptidase.
Thupl.28200440s0001	PF05577	PFAM	Serine carboxypeptidase S28
Thupl.28200440s0001	PTHR11010	PANTHER	PROTEASE S28 PRO-X CARBOXYPEPTIDASE-RELATED
Thupl.28200440s0001	GO:0008236	GO	serine-type peptidase activity
Thupl.28200440s0001	GO:0006508	GO	proteolysis
Thupl.28200440s0001	PTHR11010:SF48	PANTHER
Thupl.28200608s0001	PTHR22811	PANTHER	TRANSMEMBRANE EMP24 DOMAIN-CONTAINING PROTEIN
Thupl.28200608s0001	SignalP-noTM	SIGNALP
Thupl.28200608s0001	PTHR22811:SF50	PANTHER
Thupl.28200608s0001	GO:0016021	GO	integral to membrane
Thupl.28200608s0001	GO:0006810	GO	transport
Thupl.28200608s0001	KOG1692	KOG	Putative cargo transport protein EMP24 (p24 protein family)
Thupl.28200608s0001	PF01105	PFAM	emp24/gp25L/p24 family/GOLD
Thupl.28201497s0001	PF13855	PFAM	Leucine rich repeat
Thupl.28201497s0001	PTHR27004	PANTHER
Thupl.28201497s0001	2.7.11.1	EC	Non-specific serine/threonine protein kinase.
Thupl.28201497s0001	GO:0005515	GO	protein binding
Thupl.28201497s0002	4.1.2.10	EC	(R)-mandelonitrile lyase.
Thupl.28201533s0001	GO:0048544	GO	recognition of pollen
Thupl.28201533s0001	PF01453	PFAM	D-mannose binding lectin
Thupl.28201533s0001	2.7.11.1	EC	Non-specific serine/threonine protein kinase.
Thupl.28201533s0001	SignalP-noTM	SIGNALP
Thupl.28201533s0001	PTHR44011	PANTHER
Thupl.28201533s0001	PF00954	PFAM	S-locus glycoprotein family
Thupl.28201533s0001	PF08276	PFAM	PAN-like domain
Thupl.28202069s0001	PTHR33681	PANTHER
Thupl.28202069s0001	PTHR33681:SF4	PANTHER
Thupl.28202069s0001	PF08787	PFAM	Alginate lyase
Thupl.28202069s0001	SignalP-noTM	SIGNALP
Thupl.28202250s0001	GO:0004672	GO	protein kinase activity
Thupl.28202250s0001	PF00139	PFAM	Legume lectin domain
Thupl.28202250s0001	2.7.11.1	EC	Non-specific serine/threonine protein kinase.
Thupl.28202250s0001	KOG1187	KOG	Serine/threonine protein kinase
Thupl.28202250s0001	GO:0030246	GO	carbohydrate binding
Thupl.28202250s0001	PF00069	PFAM	Protein kinase domain
Thupl.28202250s0001	PTHR27007	PANTHER
Thupl.28202250s0001	GO:0005524	GO	ATP binding
Thupl.28202250s0001	GO:0006468	GO	protein phosphorylation
Thupl.28202798s0001	PF03936	PFAM	Terpene synthase family, metal binding domain
Thupl.28202798s0001	PTHR31225	PANTHER	FAMILY NOT NAMED
Thupl.28202798s0001	GO:0016829	GO	lyase activity
Thupl.28202798s0001	4.2.3.52	EC	(4S)-beta-phellandrene synthase (geranyl-diphosphate-cyclizing).
Thupl.28202798s0001	GO:0010333	GO	terpene synthase activity
Thupl.28202798s0001	GO:0000287	GO	magnesium ion binding
Thupl.28202865s0001	PF01535	PFAM	PPR repeat
Thupl.28202865s0001	PF13041	PFAM	PPR repeat family
Thupl.28202865s0001	PTHR24015:SF811	PANTHER
Thupl.28202865s0001	PTHR24015	PANTHER	FAMILY NOT NAMED
Thupl.28203482s0001	PTHR11203:SF11	PANTHER	CLEAVAGE AND POLYADENYLATION SPECIFICITY FACTOR
Thupl.28203482s0001	PTHR11203	PANTHER	CLEAVAGE AND POLYADENYLATION SPECIFICITY FACTOR
Thupl.28203874s0001	PTHR33927	PANTHER
Thupl.28203874s0001	PTHR33927:SF1	PANTHER
Thupl.28204548s0001	PTHR31621	PANTHER	FAMILY NOT NAMED
Thupl.28204548s0001	PF05078	PFAM	Protein of unknown function (DUF679)
Thupl.28205869s0001	3.4.11.18	EC	Methionyl aminopeptidase.
Thupl.28205869s0001	PTHR43330:SF10	PANTHER
Thupl.28205869s0001	PTHR43330	PANTHER
Thupl.28206302s0001	PF12874	PFAM	Zinc-finger of C2H2 type
Thupl.28206302s0001	PTHR23067	PANTHER	DOUBLE-STRANDED RNA-BINDING ZINC FINGER PROTEIN
Thupl.28207505s0001	PTHR11945	PANTHER	MADS BOX PROTEIN
Thupl.28207505s0001	PF00319	PFAM	SRF-type transcription factor (DNA-binding and dimerisation domain)
Thupl.28207505s0001	GO:0003677	GO	DNA binding
Thupl.28207505s0001	GO:0046983	GO	protein dimerization activity
Thupl.28207505s0001	PTHR11945:SF172	PANTHER
Thupl.28208032s0001	PF00082	PFAM	Subtilase family
Thupl.28208032s0001	3.4.21.25	EC	Cucumisin.
Thupl.28208032s0001	GO:0006508	GO	proteolysis
Thupl.28208032s0001	GO:0004252	GO	serine-type endopeptidase activity
Thupl.28208032s0001	PTHR10795	PANTHER	PROPROTEIN CONVERTASE SUBTILISIN/KEXIN
Thupl.28209669s0001	PF14709	PFAM	double strand RNA binding domain from DEAD END PROTEIN 1
Thupl.28209835s0001	PF03514	PFAM	GRAS domain family
Thupl.28209835s0001	PTHR31636	PANTHER	FAMILY NOT NAMED
Thupl.28210373s0001	GO:0009415	GO	response to water stimulus
Thupl.28210373s0001	GO:0006950	GO	response to stress
Thupl.28210373s0001	PF00257	PFAM	Dehydrin
Thupl.28210373s0001	PTHR33346	PANTHER
Thupl.28211739s0001	3.6.4.12	EC	DNA helicase.
Thupl.28211848s0001	PTHR13683:SF223	PANTHER
Thupl.28211848s0001	PF14541	PFAM	Xylanase inhibitor C-terminal
Thupl.28211848s0001	KOG1339	KOG	Aspartyl protease
Thupl.28211848s0001	GO:0006508	GO	proteolysis
Thupl.28211848s0001	GO:0004190	GO	aspartic-type endopeptidase activity
Thupl.28211848s0001	3.4.23.12	EC	Nepenthesin.
Thupl.28211848s0001	PF14543	PFAM	Xylanase inhibitor N-terminal
Thupl.28211848s0001	PTHR13683	PANTHER	ASPARTYL PROTEASES
Thupl.28211911s0001	PF02519	PFAM	Auxin responsive protein
Thupl.28211911s0001	PTHR31374	PANTHER	FAMILY NOT NAMED
Thupl.28211911s0001	GO:0009733	GO	response to auxin stimulus
Thupl.28211911s0001	PTHR31374:SF22	PANTHER
Thupl.28211911s0001	K14488	KEGGORTH	SAUR family protein
Thupl.28212607s0001	PTHR31509:SF18	PANTHER
Thupl.28212607s0001	PF03087	PFAM	Arabidopsis protein of unknown function
Thupl.28212607s0001	PTHR31509	PANTHER	FAMILY NOT NAMED
Thupl.28212759s0001	GO:0003690	GO	double-stranded DNA binding
Thupl.28212759s0001	PF02536	PFAM	mTERF
Thupl.28212759s0001	GO:0006355	GO	regulation of transcription, DNA-dependent
Thupl.28212759s0001	PTHR13068	PANTHER	CGI-12 PROTEIN-RELATED
Thupl.28212829s0001	GO:0003677	GO	DNA binding
Thupl.28212829s0001	PTHR13935	PANTHER	ACHAETE-SCUTE TRANSCRIPTION FACTOR-RELATED
Thupl.28212829s0001	GO:0046983	GO	protein dimerization activity
Thupl.28212829s0001	PF00010	PFAM	Helix-loop-helix DNA-binding domain
Thupl.28213126s0001	PTHR12616	PANTHER	VACUOLAR PROTEIN SORTING VPS41
Thupl.28213126s0001	GO:0006886	GO	intracellular protein transport
Thupl.28213126s0001	GO:0016192	GO	vesicle-mediated transport
Thupl.28213126s0001	PF00637	PFAM	Region in Clathrin and VPS
Thupl.28213126s0001	PTHR12616:SF8	PANTHER
Thupl.28213571s0001	PF00190	PFAM	Cupin
Thupl.28213571s0001	PTHR31238:SF46	PANTHER
Thupl.28213571s0001	PTHR31238	PANTHER	FAMILY NOT NAMED
Thupl.28213571s0001	GO:0045735	GO	nutrient reservoir activity
Thupl.28213571s0001	SignalP-noTM	SIGNALP
Thupl.28213881s0001	SignalP-TM	SIGNALP
Thupl.28214135s0001	SignalP-noTM	SIGNALP
Thupl.28214135s0001	PF00332	PFAM	Glycosyl hydrolases family 17
Thupl.28214135s0001	PTHR32227:SF226	PANTHER
Thupl.28214135s0001	GO:0005975	GO	carbohydrate metabolic process
Thupl.28214135s0001	3.2.1.39	EC	Glucan endo-1,3-beta-D-glucosidase.
Thupl.28214135s0001	PTHR32227	PANTHER	FAMILY NOT NAMED
Thupl.28214135s0001	GO:0004553	GO	hydrolase activity, hydrolyzing O-glycosyl compounds
Thupl.28214878s0001	GO:0008271	GO	secondary active sulfate transmembrane transporter activity
Thupl.28214878s0001	GO:0016021	GO	integral to membrane
Thupl.28214878s0001	GO:0016020	GO	membrane
Thupl.28214878s0001	PTHR11814:SF65	PANTHER
Thupl.28214878s0001	GO:0008272	GO	sulfate transport
Thupl.28214878s0001	GO:0005886	GO	plasma membrane
Thupl.28214878s0001	GO:0055085	GO	transmembrane transport
Thupl.28214878s0001	PF01740	PFAM	STAS domain
Thupl.28214878s0001	PF00916	PFAM	Sulfate transporter family
Thupl.28214878s0001	GO:0015116	GO	sulfate transmembrane transporter activity
Thupl.28214878s0001	PTHR11814	PANTHER	SULFATE TRANSPORTER
Thupl.28215513s0001	GO:0016614	GO	oxidoreductase activity, acting on CH-OH group of donors
Thupl.28215513s0001	PF05199	PFAM	GMC oxidoreductase
Thupl.28215513s0001	PF00732	PFAM	GMC oxidoreductase
Thupl.28215513s0001	PTHR11552	PANTHER	GLUCOSE-METHANOL-CHOLINE (GMC) OXIDOREDUCTASE
Thupl.28215513s0001	PTHR11552:SF146	PANTHER
Thupl.28215513s0001	GO:0050660	GO	flavin adenine dinucleotide binding
Thupl.28215513s0001	GO:0055114	GO	oxidation-reduction process
Thupl.28215716s0001	PTHR31692:SF4	PANTHER
Thupl.28215716s0001	PTHR31692	PANTHER	FAMILY NOT NAMED
Thupl.28215716s0001	PF03330	PFAM	Rare lipoprotein A (RlpA)-like double-psi beta-barrel
Thupl.28216949s0001	1.5.3.17	EC	Non-specific polyamine oxidase.
Thupl.28216949s0001	GO:0055114	GO	oxidation-reduction process
Thupl.28216949s0001	PTHR10742	PANTHER	AMINE OXIDASE
Thupl.28216949s0001	PF01593	PFAM	Flavin containing amine oxidoreductase
Thupl.28216949s0001	GO:0016491	GO	oxidoreductase activity
Thupl.28216949s0001	PTHR10742:SF264	PANTHER
Thupl.28219388s0001	PTHR35481	PANTHER
Thupl.28221764s0001	PF03081	PFAM	Exo70 exocyst complex subunit
Thupl.28221764s0001	PTHR12542	PANTHER	EXOCYST COMPLEX PROTEIN EXO70
Thupl.28221764s0001	GO:0000145	GO	exocyst
Thupl.28221764s0001	GO:0006887	GO	exocytosis
Thupl.28222118s0001	PTHR38934:SF5	PANTHER
Thupl.28222118s0001	SignalP-TM	SIGNALP
Thupl.28222118s0001	PTHR38934	PANTHER
Thupl.28222694s0001	GO:0055114	GO	oxidation-reduction process
Thupl.28222694s0001	GO:0005506	GO	iron ion binding
Thupl.28222694s0001	GO:0020037	GO	heme binding
Thupl.28222694s0001	GO:0016705	GO	oxidoreductase activity, acting on paired donors, with incorporation or reduction of molecular oxygen
Thupl.28222694s0001	1.14.13.109	EC	Abieta-7,13-dien-18-ol hydroxylase.
Thupl.28222694s0001	PTHR24298	PANTHER	FAMILY NOT NAMED
Thupl.28222694s0001	PF00067	PFAM	Cytochrome P450
Thupl.28222804s0001	PTHR33052	PANTHER
Thupl.28222804s0001	PF14009	PFAM	Domain of unknown function (DUF4228)
Thupl.28222846s0001	GO:0016758	GO	transferase activity, transferring hexosyl groups
Thupl.28222846s0001	GO:0008152	GO	metabolic process
Thupl.28222846s0001	KOG1192	KOG	UDP-glucuronosyl and UDP-glucosyl transferase
Thupl.28222846s0001	PTHR11926	PANTHER	GLUCOSYL/GLUCURONOSYL TRANSFERASES
Thupl.28222846s0001	PF00201	PFAM	UDP-glucoronosyl and UDP-glucosyl transferase
Thupl.28222846s0001	2.4.1.324	EC
Thupl.28222846s0001	PTHR11926:SF756	PANTHER
Thupl.28222865s0001	3.1.1.14	EC	Chlorophyllase.
Thupl.28222865s0001	GO:0047746	GO	chlorophyllase activity
Thupl.28222865s0001	PF07224	PFAM	Chlorophyllase
Thupl.28222865s0001	PTHR33428:SF1	PANTHER
Thupl.28222865s0001	PTHR33428	PANTHER
Thupl.28222865s0001	GO:0015996	GO	chlorophyll catabolic process
Thupl.28224005s0001	PTHR24412	PANTHER	FAMILY NOT NAMED
Thupl.28224005s0001	PTHR24412:SF217	PANTHER
Thupl.28224772s0001	PF07859	PFAM	alpha/beta hydrolase fold
Thupl.28224772s0001	PTHR23024:SF135	PANTHER
Thupl.28224772s0001	3.1.1.1	EC	Carboxylesterase.
Thupl.28224772s0001	GO:0008152	GO	metabolic process
Thupl.28224772s0001	GO:0016787	GO	hydrolase activity
Thupl.28224772s0001	PTHR23024	PANTHER	MEMBER OF 'GDXG' FAMILY OF LIPOLYTIC ENZYMES
Thupl.28225062s0001	GO:0055114	GO	oxidation-reduction process
Thupl.28225062s0001	KOG0156	KOG	Cytochrome P450 CYP2 subfamily
Thupl.28225062s0001	GO:0005506	GO	iron ion binding
Thupl.28225062s0001	GO:0016705	GO	oxidoreductase activity, acting on paired donors, with incorporation or reduction of molecular oxygen
Thupl.28225062s0001	GO:0020037	GO	heme binding
Thupl.28225062s0001	1.14.13.109	EC	Abieta-7,13-dien-18-ol hydroxylase.
Thupl.28225062s0001	PTHR24298	PANTHER	FAMILY NOT NAMED
Thupl.28225062s0001	PF00067	PFAM	Cytochrome P450
Thupl.28226416s0001	PF00929	PFAM	Exonuclease
Thupl.28226416s0001	3.1.13.1	EC	Exoribonuclease II.
Thupl.28226416s0001	KOG2249	KOG	3'-5' exonuclease
Thupl.28226416s0001	PTHR12801:SF56	PANTHER
Thupl.28226416s0001	PTHR12801	PANTHER	EXONUCLEASE
Thupl.28228376s0001	PF06839	PFAM	GRF zinc finger
Thupl.28228376s0001	5.99.1.2	EC	DNA topoisomerase.
Thupl.28228376s0001	GO:0008270	GO	zinc ion binding
Thupl.28229122s0001	PTHR44046	PANTHER
Thupl.28229302s0001	PTHR31692:SF4	PANTHER
Thupl.28229302s0001	PF01357	PFAM	Pollen allergen
Thupl.28229302s0001	PTHR31692	PANTHER	FAMILY NOT NAMED
Thupl.28230260s0001	GO:0055085	GO	transmembrane transport
Thupl.28230260s0001	PTHR24064	PANTHER	FAMILY NOT NAMED
Thupl.28230260s0001	GO:0022857	GO	transmembrane transporter activity
Thupl.28230260s0001	K08176	KEGGORTH	MFS transporter, PHS family, inorganic phosphate transporter
Thupl.28230260s0001	GO:0016021	GO	integral to membrane
Thupl.28230260s0001	PF00083	PFAM	Sugar (and other) transporter
Thupl.28230260s0001	PTHR24064:SF414	PANTHER
Thupl.28231171s0001	PF14571	PFAM	Stress-induced protein Di19, C-terminal
Thupl.28231171s0001	PTHR31875	PANTHER	FAMILY NOT NAMED
Thupl.28233508s0001	GO:0005515	GO	protein binding
Thupl.28233508s0001	PF00646	PFAM	F-box domain
Thupl.28233991s0001	PTHR11206:SF78	PANTHER
Thupl.28233991s0001	GO:0015238	GO	drug transmembrane transporter activity
Thupl.28233991s0001	PTHR11206	PANTHER	MULTIDRUG RESISTANCE PROTEIN
Thupl.28233991s0001	GO:0055085	GO	transmembrane transport
Thupl.28233991s0001	GO:0015297	GO	antiporter activity
Thupl.28233991s0001	GO:0006855	GO	drug transmembrane transport
Thupl.28233991s0001	GO:0016020	GO	membrane
Thupl.28233991s0001	SignalP-noTM	SIGNALP
Thupl.28233991s0001	PF01554	PFAM	MatE
Thupl.28233991s0001	K03327	KEGGORTH	multidrug resistance protein, MATE family
Thupl.28234688s0001	PTHR37247	PANTHER
Thupl.28311958s0001	GO:0006810	GO	transport
Thupl.28311958s0001	GO:0005215	GO	transporter activity
Thupl.28311958s0001	GO:0016021	GO	integral to membrane
Thupl.28311958s0001	PTHR19229:SF141	PANTHER
Thupl.28311958s0001	PTHR19229	PANTHER	ATP-BINDING CASSETTE TRANSPORTER SUBFAMILY A (ABCA)
Thupl.28312230s0001	GO:0055114	GO	oxidation-reduction process
Thupl.28312230s0001	PTHR43507:SF6	PANTHER
Thupl.28312230s0001	PF00361	PFAM	NADH-Ubiquinone/plastoquinone (complex I), various chains
Thupl.28312230s0001	PTHR43507	PANTHER
Thupl.28312230s0001	GO:0008137	GO	NADH dehydrogenase (ubiquinone) activity
Thupl.28312230s0001	GO:0042773	GO	ATP synthesis coupled electron transport
Thupl.28312230s0001	1.6.5.3	EC	NADH:ubiquinone reductase (H(+)-translocating).
Thupl.28312684s0001	GO:0016758	GO	transferase activity, transferring hexosyl groups
Thupl.28312684s0001	GO:0008152	GO	metabolic process
Thupl.28312684s0001	KOG1192	KOG	UDP-glucuronosyl and UDP-glucosyl transferase
Thupl.28312684s0001	PTHR11926	PANTHER	GLUCOSYL/GLUCURONOSYL TRANSFERASES
Thupl.28312684s0001	PF00201	PFAM	UDP-glucoronosyl and UDP-glucosyl transferase
Thupl.28312684s0001	PTHR11926:SF500	PANTHER
Thupl.28312684s0001	2.4.1.128	EC	Scopoletin glucosyltransferase.
Thupl.28313703s0001	PTHR11017	PANTHER	LEUCINE-RICH REPEAT-CONTAINING PROTEIN
Thupl.283142023s0001	PTHR11215:SF3	PANTHER	MYG1 PROTEIN-RELATED
Thupl.283142023s0001	PF03690	PFAM	Uncharacterised protein family (UPF0160)
Thupl.283142023s0001	PTHR11215	PANTHER	METAL DEPENDENT HYDROLASE - RELATED
Thupl.28315356s0001	PF01582	PFAM	TIR domain
Thupl.28315356s0001	GO:0005515	GO	protein binding
Thupl.28315356s0001	GO:0007165	GO	signal transduction
Thupl.28315356s0001	PTHR11017	PANTHER	LEUCINE-RICH REPEAT-CONTAINING PROTEIN
Thupl.28317569s0001	PTHR33098	PANTHER
Thupl.28317569s0001	PF14364	PFAM	Domain of unknown function (DUF4408)
Thupl.28317569s0001	PF05553	PFAM	Cotton fibre expressed protein
Thupl.28317569s0001	PTHR33098:SF10	PANTHER
Thupl.28319804s0001	GO:0005515	GO	protein binding
Thupl.28319804s0001	PTHR27000:SF298	PANTHER
Thupl.28319804s0001	PTHR27000	PANTHER
Thupl.28319804s0001	KOG0472	KOG	Leucine-rich repeat protein
Thupl.28319804s0001	2.7.11.1	EC	Non-specific serine/threonine protein kinase.
Thupl.28319804s0001	PF00560	PFAM	Leucine Rich Repeat
Thupl.28319804s0001	PF13855	PFAM	Leucine rich repeat
Thupl.28321505s0001	PTHR10361:SF56	PANTHER
Thupl.28321505s0001	PTHR10361	PANTHER	SODIUM-BILE ACID COTRANSPORTER
Thupl.28323460s0001	GO:0055114	GO	oxidation-reduction process
Thupl.28323460s0001	PTHR43507:SF6	PANTHER
Thupl.28323460s0001	GO:0008137	GO	NADH dehydrogenase (ubiquinone) activity
Thupl.28323460s0001	PTHR43507	PANTHER
Thupl.28323460s0001	1.6.5.3	EC	NADH:ubiquinone reductase (H(+)-translocating).
Thupl.28323460s0001	GO:0042773	GO	ATP synthesis coupled electron transport
Thupl.28323894s0001	PF03171	PFAM	2OG-Fe(II) oxygenase superfamily
Thupl.28323894s0001	GO:0055114	GO	oxidation-reduction process
Thupl.28323894s0001	PTHR10209:SF212	PANTHER
Thupl.28323894s0001	KOG0143	KOG	Iron/ascorbate family oxidoreductases
Thupl.28323894s0001	GO:0016491	GO	oxidoreductase activity
Thupl.28323894s0001	PTHR10209	PANTHER	OXIDOREDUCTASE, 2OG-FE(II) OXYGENASE FAMILY PROTEIN
Thupl.28324112s0001	PTHR34657	PANTHER
Thupl.28324253s0001	PF05183	PFAM	RNA dependent RNA polymerase
Thupl.28324253s0001	2.7.7.48	EC	RNA-directed RNA polymerase.
Thupl.28324253s0001	PTHR23079:SF18	PANTHER
Thupl.28324253s0001	GO:0003968	GO	RNA-directed RNA polymerase activity
Thupl.28324253s0001	PTHR23079	PANTHER	RNA-DEPENDENT RNA POLYMERASE
Thupl.28327902s0001	PF08613	PFAM	Cyclin
Thupl.28327902s0001	KOG1674	KOG	Cyclin
Thupl.28327902s0001	PTHR15615	PANTHER	UNCHARACTERIZED
Thupl.28327902s0001	GO:0000079	GO	regulation of cyclin-dependent protein serine/threonine kinase activity
Thupl.28327902s0001	GO:0019901	GO	protein kinase binding
Thupl.28327902s0001	PTHR15615:SF15	PANTHER
Thupl.28329047s0001	GO:0030170	GO	pyridoxal phosphate binding
Thupl.28329047s0001	4.4.1.11	EC	Methionine gamma-lyase.
Thupl.28329047s0001	PF01053	PFAM	Cys/Met metabolism PLP-dependent enzyme
Thupl.28329749s0001	PTHR10992:SF992	PANTHER
Thupl.28329749s0001	PTHR10992	PANTHER	ALPHA/BETA HYDROLASE FOLD-CONTAINING PROTEIN
Thupl.28332842s0001	3.1.11.2	EC	Exodeoxyribonuclease III.
Thupl.28333828s0001	PF00931	PFAM	NB-ARC domain
Thupl.28333828s0001	PTHR11017	PANTHER	LEUCINE-RICH REPEAT-CONTAINING PROTEIN
Thupl.28333828s0001	GO:0043531	GO	ADP binding
Thupl.28336543s0001	PF03107	PFAM	C1 domain
Thupl.28336543s0001	PTHR13871:SF51	PANTHER
Thupl.28336543s0001	PTHR13871	PANTHER	THIOREDOXIN
Thupl.28336934s0001	GO:0003700	GO	sequence-specific DNA binding transcription factor activity
Thupl.28336934s0001	PF00847	PFAM	AP2 domain
Thupl.28336934s0001	GO:0006355	GO	regulation of transcription, DNA-dependent
Thupl.28336934s0001	PTHR31729	PANTHER	FAMILY NOT NAMED
Thupl.28341970s0001	PF00875	PFAM	DNA photolyase
Thupl.28341970s0001	PTHR11455	PANTHER	CRYPTOCHROME
Thupl.28341970s0001	4.1.99.13	EC	(6-4)DNA photolyase.
Thupl.28344819s0001	PTHR31360:SF0	PANTHER	SUBFAMILY NOT NAMED
Thupl.28344819s0001	PF06884	PFAM	Protein of unknown function (DUF1264)
Thupl.28344819s0001	PTHR31360	PANTHER	FAMILY NOT NAMED
Thupl.28345940s0001	PTHR10285	PANTHER	URIDINE KINASE
Thupl.28345940s0001	PF14681	PFAM	Uracil phosphoribosyltransferase
Thupl.28345940s0001	2.4.2.9	EC	Uracil phosphoribosyltransferase.
Thupl.28345940s0001	PTHR10285:SF46	PANTHER
Thupl.28345940s0001	K00761	KEGGORTH	uracil phosphoribosyltransferase [EC:2.4.2.9]
Thupl.28346718s0001	3.4.23.12	EC	Nepenthesin.
Thupl.28346718s0001	PTHR13683	PANTHER	ASPARTYL PROTEASES
Thupl.28346718s0001	PF14543	PFAM	Xylanase inhibitor N-terminal
Thupl.28346718s0001	GO:0006508	GO	proteolysis
Thupl.28346718s0001	GO:0004190	GO	aspartic-type endopeptidase activity
Thupl.28346718s0001	PF14541	PFAM	Xylanase inhibitor C-terminal
Thupl.28346718s0001	KOG1339	KOG	Aspartyl protease
Thupl.28346718s0001	SignalP-noTM	SIGNALP
Thupl.28346718s0001	PTHR13683:SF223	PANTHER
Thupl.28347221s0001	PTHR19957	PANTHER	SYNTAXIN
Thupl.28347221s0001	PTHR19957:SF207	PANTHER
Thupl.28347953s0001	PF13833	PFAM	EF-hand domain pair
Thupl.28347953s0001	PTHR44180	PANTHER
Thupl.28347953s0001	KOG0028	KOG	Ca2+-binding protein (centrin/caltractin), EF-Hand superfamily protein
Thupl.28347953s0001	GO:0005509	GO	calcium ion binding
Thupl.28352085s0001	PTHR21493	PANTHER	CGI-141-RELATED/LIPASE CONTAINING PROTEIN
Thupl.28352085s0001	3.1.1.3	EC	Triacylglycerol lipase.
Thupl.28352085s0001	PTHR21493:SF131	PANTHER
Thupl.28353139s0001	PTHR24298	PANTHER	FAMILY NOT NAMED
Thupl.28353139s0001	PF00067	PFAM	Cytochrome P450
Thupl.28353139s0001	GO:0005506	GO	iron ion binding
Thupl.28353139s0001	1.14.13.152	EC	Geraniol 8-hydroxylase.
Thupl.28353139s0001	KOG0156	KOG	Cytochrome P450 CYP2 subfamily
Thupl.28353139s0001	GO:0055114	GO	oxidation-reduction process
Thupl.28353139s0001	PTHR24298:SF196	PANTHER
Thupl.28353139s0001	GO:0020037	GO	heme binding
Thupl.28353139s0001	GO:0016705	GO	oxidoreductase activity, acting on paired donors, with incorporation or reduction of molecular oxygen
Thupl.28355262s0001	PTHR21321	PANTHER	PNAS-3 RELATED
Thupl.28355262s0001	PTHR21321:SF4	PANTHER
Thupl.28355262s0001	GO:0000178	GO	exosome (RNase complex)
Thupl.28355262s0001	PF15985	PFAM
Thupl.28355262s0001	K03679	KEGGORTH	exosome complex component RRP4
Thupl.28355262s0001	GO:0003723	GO	RNA binding
Thupl.28358699s0001	PTHR31704	PANTHER	FAMILY NOT NAMED
Thupl.28358928s0001	GO:0003690	GO	double-stranded DNA binding
Thupl.28358928s0001	KOG1267	KOG	Mitochondrial transcription termination factor, mTERF
Thupl.28358928s0001	GO:0006355	GO	regulation of transcription, DNA-dependent
Thupl.28358928s0001	PTHR13068	PANTHER	CGI-12 PROTEIN-RELATED
Thupl.28358928s0001	PF02536	PFAM	mTERF
Thupl.28358946s0001	PF01190	PFAM	Pollen proteins Ole e I like
Thupl.28358946s0001	PTHR31614	PANTHER	FAMILY NOT NAMED
Thupl.28359128s0001	PF00304	PFAM	Gamma-thionin family
Thupl.28359128s0001	PTHR33147	PANTHER
Thupl.28359128s0001	PTHR33147:SF4	PANTHER
Thupl.28359128s0001	SignalP-noTM	SIGNALP
Thupl.28360119s0001	3.2.1.15	EC	Polygalacturonase.
Thupl.28360119s0001	SignalP-noTM	SIGNALP
Thupl.28360119s0001	GO:0005975	GO	carbohydrate metabolic process
Thupl.28360119s0001	PF17181	PFAM
Thupl.28360119s0001	GO:0004650	GO	polygalacturonase activity
Thupl.28360119s0001	PTHR31375:SF29	PANTHER
Thupl.28360119s0001	PTHR31375	PANTHER	FAMILY NOT NAMED
Thupl.28360119s0001	PF00295	PFAM	Glycosyl hydrolases family 28
Thupl.28361378s0001	PF00472	PFAM	RF-1 domain
Thupl.28361378s0001	GO:0003747	GO	translation release factor activity
Thupl.28361378s0001	PF03462	PFAM	PCRF domain
Thupl.28361378s0001	PTHR43116	PANTHER
Thupl.28361378s0001	GO:0006415	GO	translational termination
Thupl.28361378s0001	PTHR43116:SF3	PANTHER
Thupl.28363055s0001	PTHR15184	PANTHER	ATP SYNTHASE
Thupl.28363055s0001	PTHR15184:SF43	PANTHER
Thupl.28363055s0001	3.6.3.14	EC	H(+)-transporting two-sector ATPase.
Thupl.28363110s0001	PTHR45589	PANTHER
Thupl.28363110s0001	PF00400	PFAM	WD domain, G-beta repeat
Thupl.28363110s0001	GO:0005515	GO	protein binding
Thupl.28363110s0001	KOG0278	KOG	Serine/threonine kinase receptor-associated protein
Thupl.28366079s0001	GO:0006508	GO	proteolysis
Thupl.28366079s0001	GO:0004252	GO	serine-type endopeptidase activity
Thupl.28366079s0001	PTHR10795	PANTHER	PROPROTEIN CONVERTASE SUBTILISIN/KEXIN
Thupl.28366079s0001	3.4.14.10	EC	Tripeptidyl-peptidase II.
Thupl.28366079s0001	PF00082	PFAM	Subtilase family
Thupl.28366079s0001	PTHR10795:SF444	PANTHER
Thupl.28366476s0001	PTHR31965	PANTHER	FAMILY NOT NAMED
Thupl.28369750s0001	2.7.11.1	EC	Non-specific serine/threonine protein kinase.
Thupl.28371248s0001	PTHR34054	PANTHER
Thupl.28374864s0001	K13356	KEGGORTH	fatty acyl-CoA reductase [EC:1.2.1.-]
Thupl.28374864s0001	GO:0080019	GO	fatty-acyl-CoA reductase (alcohol-forming) activity
Thupl.28374864s0001	PF07993	PFAM	Male sterility protein
Thupl.28374864s0001	PF03015	PFAM	Male sterility protein
Thupl.28374864s0001	1.2.1.84	EC	Alcohol-forming fatty acyl-CoA reductase.
Thupl.28374864s0001	KOG1221	KOG	Acyl-CoA reductase
Thupl.28374864s0001	PTHR11011	PANTHER	MALE STERILITY PROTEIN 2-RELATED
Thupl.28374864s0001	PTHR11011:SF25	PANTHER
Thupl.28374905s0001	GO:0016829	GO	lyase activity
Thupl.28374905s0001	PTHR31739	PANTHER	FAMILY NOT NAMED
Thupl.28374905s0001	GO:0000287	GO	magnesium ion binding
Thupl.28374905s0001	GO:0010333	GO	terpene synthase activity
Thupl.28374905s0001	GO:0008152	GO	metabolic process
Thupl.28374905s0001	PF03936	PFAM	Terpene synthase family, metal binding domain
Thupl.28374905s0001	PF01397	PFAM	Terpene synthase, N-terminal domain
Thupl.28374905s0001	4.2.3.17	EC	Taxadiene synthase.
Thupl.28377019s0001	2.1.1.37	EC	DNA (cytosine-5-)-methyltransferase.
Thupl.28377126s0001	GO:0043531	GO	ADP binding
Thupl.28377126s0001	PTHR11017	PANTHER	LEUCINE-RICH REPEAT-CONTAINING PROTEIN
Thupl.28377126s0001	PTHR11017:SF191	PANTHER
Thupl.28377126s0001	PF00931	PFAM	NB-ARC domain
Thupl.28379002s0001	PF00931	PFAM	NB-ARC domain
Thupl.28379002s0001	GO:0005515	GO	protein binding
Thupl.28379002s0001	PF01582	PFAM	TIR domain
Thupl.28379002s0001	PTHR11017	PANTHER	LEUCINE-RICH REPEAT-CONTAINING PROTEIN
Thupl.28379002s0001	GO:0043531	GO	ADP binding
Thupl.28379002s0001	GO:0007165	GO	signal transduction
Thupl.28379107s0001	2.7.7.49	EC	RNA-directed DNA polymerase.
Thupl.28379107s0001	PTHR45329	PANTHER
Thupl.28379257s0001	PF13041	PFAM	PPR repeat family
Thupl.28379257s0001	PTHR24015	PANTHER	FAMILY NOT NAMED
Thupl.28379257s0001	PF01535	PFAM	PPR repeat
Thupl.28379257s0001	PTHR24015:SF424	PANTHER
Thupl.28380435s0001	PTHR22950	PANTHER	AMINO ACID TRANSPORTER
Thupl.28380435s0001	PF01490	PFAM	Transmembrane amino acid transporter protein
Thupl.28380435s0001	KOG1303	KOG	Amino acid transporters
Thupl.28380435s0001	PTHR22950:SF242	PANTHER
Thupl.28381399s0001	PF00004	PFAM	ATPase family associated with various cellular activities (AAA)
Thupl.28381399s0001	PTHR23077	PANTHER	AAA-FAMILY ATPASE
Thupl.28381399s0001	PTHR23077:SF55	PANTHER
Thupl.28381399s0001	GO:0005524	GO	ATP binding
Thupl.28381674s0001	GO:0016788	GO	hydrolase activity, acting on ester bonds
Thupl.28381674s0001	SignalP-noTM	SIGNALP
Thupl.28381674s0001	PTHR22835	PANTHER	ZINC FINGER FYVE DOMAIN CONTAINING PROTEIN
Thupl.28381674s0001	PTHR22835:SF216	PANTHER
Thupl.28381674s0001	PF00657	PFAM	GDSL-like Lipase/Acylhydrolase
Thupl.28381803s0001	2.7.11.1	EC	Non-specific serine/threonine protein kinase.
Thupl.28386547s0001	PTHR13271	PANTHER	UNCHARACTERIZED PUTATIVE METHYLTRANSFERASE
Thupl.28386547s0001	PTHR13271:SF9	PANTHER
Thupl.28386547s0001	2.1.1.127	EC	[Ribulose-bisphosphate carboxylase]-lysine N-methyltransferase.
Thupl.28387320s0001	PF13041	PFAM	PPR repeat family
Thupl.28387320s0001	PTHR24015	PANTHER	FAMILY NOT NAMED
Thupl.28387320s0001	PTHR24015:SF447	PANTHER
Thupl.28387320s0001	PF01535	PFAM	PPR repeat
Thupl.28388137s0001	PTHR45329	PANTHER
Thupl.28390819s0001	PTHR27001	PANTHER
Thupl.28390819s0001	PTHR27001:SF100	PANTHER
Thupl.28390819s0001	2.7.11.1	EC	Non-specific serine/threonine protein kinase.
Thupl.28390977s0001	GO:0004601	GO	peroxidase activity
Thupl.28390977s0001	GO:0020037	GO	heme binding
Thupl.28390977s0001	PTHR31235	PANTHER	FAMILY NOT NAMED
Thupl.28390977s0001	GO:0006979	GO	response to oxidative stress
Thupl.28390977s0001	1.11.1.7	EC	Peroxidase.
Thupl.28390977s0001	PF00141	PFAM	Peroxidase
Thupl.28390977s0001	GO:0055114	GO	oxidation-reduction process
Thupl.28390977s0001	PTHR31235:SF12	PANTHER
Thupl.2839138s0001	3.4.22.40	EC	Bleomycin hydrolase.
Thupl.2839138s0001	PTHR43056	PANTHER
Thupl.2839138s0001	PTHR43056:SF6	PANTHER
Thupl.28395234s0001	SignalP-TM	SIGNALP
Thupl.28395234s0001	PF05512	PFAM	AWPM-19-like family
Thupl.28395234s0001	PTHR33294	PANTHER
Thupl.28397265s0001	PTHR11183:SF93	PANTHER
Thupl.28397265s0001	2.4.1.186	EC	Glycogenin glucosyltransferase.
Thupl.28397265s0001	PTHR11183	PANTHER	GLYCOGENIN
Thupl.28404584s0001	GO:0005515	GO	protein binding
Thupl.28404584s0001	PF01582	PFAM	TIR domain
Thupl.28404584s0001	PTHR11017	PANTHER	LEUCINE-RICH REPEAT-CONTAINING PROTEIN
Thupl.28404584s0001	GO:0007165	GO	signal transduction
Thupl.28406261s0001	PTHR44056:SF1	PANTHER
Thupl.28406261s0001	PTHR44056	PANTHER
Thupl.28406261s0002	PTHR32161:SF9	PANTHER
Thupl.28406261s0002	PTHR32161	PANTHER	FAMILY NOT NAMED
Thupl.28407131s0001	SignalP-noTM	SIGNALP
Thupl.28409869s0001	K13459	KEGGORTH	disease resistance protein RPS2
Thupl.28409869s0001	PTHR43909	PANTHER
Thupl.28409869s0001	PF00931	PFAM	NB-ARC domain
Thupl.28409869s0001	GO:0005515	GO	protein binding
Thupl.28409869s0001	PF13855	PFAM	Leucine rich repeat
Thupl.28409869s0001	GO:0043531	GO	ADP binding
Thupl.28410360s0001	GO:0005992	GO	trehalose biosynthetic process
Thupl.28410360s0001	PTHR10788	PANTHER	TREHALOSE-6-PHOSPHATE SYNTHASE
Thupl.28410360s0001	GO:0003824	GO	catalytic activity
Thupl.28410360s0001	PF02358	PFAM	Trehalose-phosphatase
Thupl.28410360s0001	PTHR10788:SF6	PANTHER	TREHALOSE-6-PHOSPHATE SYNTHASE
Thupl.28413523s0001	SignalP-noTM	SIGNALP
Thupl.28416324s0001	GO:0007165	GO	signal transduction
Thupl.28416324s0001	GO:0005515	GO	protein binding
Thupl.28416324s0001	PTHR44577	PANTHER
Thupl.28416324s0001	PF01582	PFAM	TIR domain
Thupl.28416478s0001	K03234	KEGGORTH	elongation factor EF-2 [EC:3.6.5.3]
Thupl.28416478s0001	PF03144	PFAM	Elongation factor Tu domain 2
Thupl.28416478s0001	PF03764	PFAM	Elongation factor G, domain IV
Thupl.28416478s0001	PF00679	PFAM	Elongation factor G C-terminus
Thupl.28416478s0001	GO:0005525	GO	GTP binding
Thupl.28416478s0001	PF14492	PFAM	Elongation Factor G, domain II
Thupl.28416478s0001	PTHR42908	PANTHER
Thupl.28416478s0001	PTHR42908:SF11	PANTHER
Thupl.28417604s0001	GO:0055114	GO	oxidation-reduction process
Thupl.28417604s0001	1.1.1.1	EC	Alcohol dehydrogenase.
Thupl.28417604s0001	PF08240	PFAM	Alcohol dehydrogenase GroES-like domain
Thupl.28417604s0001	PTHR43880	PANTHER
Thupl.28417604s0001	PTHR43880:SF22	PANTHER
Thupl.28418892s0001	PTHR31741	PANTHER	FAMILY NOT NAMED
Thupl.28418892s0001	PF10250	PFAM	GDP-fucose protein O-fucosyltransferase
Thupl.28418892s0001	PTHR31741:SF11	PANTHER
Thupl.28418892s0002	GO:0016887	GO	ATPase activity
Thupl.28418892s0002	PTHR24221	PANTHER	FAMILY NOT NAMED
Thupl.28418892s0002	PF00005	PFAM	ABC transporter
Thupl.28418892s0002	PTHR24221:SF381	PANTHER
Thupl.28418892s0002	GO:0005524	GO	ATP binding
Thupl.28419690s0001	SignalP-noTM	SIGNALP
Thupl.28419690s0001	PTHR31692:SF4	PANTHER
Thupl.28419690s0001	PTHR31692	PANTHER	FAMILY NOT NAMED
Thupl.28419690s0001	PF03330	PFAM	Rare lipoprotein A (RlpA)-like double-psi beta-barrel
Thupl.28422481s0001	GO:0043531	GO	ADP binding
Thupl.28422481s0001	PTHR43886	PANTHER
Thupl.28422481s0001	PF00931	PFAM	NB-ARC domain
Thupl.28423339s0001	KOG1192	KOG	UDP-glucuronosyl and UDP-glucosyl transferase
Thupl.28423339s0001	PTHR11926	PANTHER	GLUCOSYL/GLUCURONOSYL TRANSFERASES
Thupl.28423339s0001	PTHR11926:SF462	PANTHER
Thupl.28423339s0001	GO:0016758	GO	transferase activity, transferring hexosyl groups
Thupl.28423339s0001	GO:0008152	GO	metabolic process
Thupl.28423339s0001	2.4.1.324	EC
Thupl.28423339s0001	PF00201	PFAM	UDP-glucoronosyl and UDP-glucosyl transferase
Thupl.28424975s0001	GO:0006270	GO	DNA replication initiation
Thupl.28424975s0001	PTHR10314	PANTHER	SER/THR DEHYDRATASE, TRP SYNTHASE
Thupl.28424975s0001	GO:0003677	GO	DNA binding
Thupl.28424975s0001	GO:0042555	GO	MCM complex
Thupl.28424975s0001	GO:0005524	GO	ATP binding
Thupl.28424975s0001	PF00291	PFAM	Pyridoxal-phosphate dependent enzyme
Thupl.28424975s0001	GO:0005634	GO	nucleus
Thupl.28424975s0001	GO:0006355	GO	regulation of transcription, DNA-dependent
Thupl.28424975s0001	4.2.3.1	EC	Threonine synthase.
Thupl.28424975s0001	GO:0003678	GO	DNA helicase activity
Thupl.28424975s0001	PTHR10314:SF158	PANTHER
Thupl.28424975s0001	PF02701	PFAM	Dof domain, zinc finger
Thupl.28424975s0001	PF12619	PFAM	Mini-chromosome maintenance protein 2
Thupl.28424975s0002	PTHR35307	PANTHER
Thupl.28425440s0001	SignalP-noTM	SIGNALP
Thupl.28426722s0001	KOG4579	KOG	Leucine-rich repeat (LRR) protein associated with apoptosis in muscle tissue
Thupl.28426722s0001	GO:0005515	GO	protein binding
Thupl.28426722s0001	PF13855	PFAM	Leucine rich repeat
Thupl.28426722s0001	PTHR27004	PANTHER
Thupl.28426722s0001	2.7.11.1	EC	Non-specific serine/threonine protein kinase.
Thupl.28428979s0001	PTHR11638	PANTHER	ATP-DEPENDENT CLP PROTEASE
Thupl.28428979s0001	PTHR11638:SF124	PANTHER
Thupl.28429502s0001	SignalP-noTM	SIGNALP
Thupl.28429502s0001	PTHR22835:SF231	PANTHER
Thupl.28429502s0001	3.1.1.49	EC	Sinapine esterase.
Thupl.28429502s0001	PTHR22835	PANTHER	ZINC FINGER FYVE DOMAIN CONTAINING PROTEIN
Thupl.28429502s0002	PTHR43029	PANTHER
Thupl.28429502s0002	PTHR43029:SF17	PANTHER
Thupl.28431187s0001	GO:0005515	GO	protein binding
Thupl.28431187s0001	PF00931	PFAM	NB-ARC domain
Thupl.28431187s0001	PF13855	PFAM	Leucine rich repeat
Thupl.28431187s0001	GO:0043531	GO	ADP binding
Thupl.28431187s0001	PTHR11017	PANTHER	LEUCINE-RICH REPEAT-CONTAINING PROTEIN
Thupl.28431462s0001	PTHR11177:SF260	PANTHER
Thupl.28431462s0001	PTHR11177	PANTHER	CHITINASE
Thupl.28432660s0001	PF00856	PFAM	SET domain
Thupl.28432660s0001	GO:0005515	GO	protein binding
Thupl.28435602s0001	PF00188	PFAM	Cysteine-rich secretory protein family
Thupl.28435602s0001	PTHR10334:SF319	PANTHER
Thupl.28435602s0001	PTHR10334	PANTHER	CYSTEINE-RICH SECRETORY PROTEIN-RELATED
Thupl.28437864s0001	PF00005	PFAM	ABC transporter
Thupl.28437864s0001	PTHR19241:SF444	PANTHER
Thupl.28437864s0001	PTHR19241	PANTHER	ATP-BINDING CASSETTE TRANSPORTER
Thupl.28437864s0001	3.6.3.25	EC	Sulfate-transporting ATPase.
Thupl.28437864s0001	GO:0005524	GO	ATP binding
Thupl.28437864s0001	GO:0016020	GO	membrane
Thupl.28437864s0001	PF01061	PFAM	ABC-2 type transporter
Thupl.28437864s0001	GO:0016887	GO	ATPase activity
Thupl.28437864s0001	PF08370	PFAM	Plant PDR ABC transporter associated
Thupl.28440293s0001	PTHR31439	PANTHER	FAMILY NOT NAMED
Thupl.28440293s0001	PTHR31439:SF2	PANTHER
Thupl.28440896s0001	PF14226	PFAM	non-haem dioxygenase in morphine synthesis N-terminal
Thupl.28440896s0001	PTHR10209	PANTHER	OXIDOREDUCTASE, 2OG-FE(II) OXYGENASE FAMILY PROTEIN
Thupl.28440896s0001	PTHR10209:SF169	PANTHER
Thupl.28440896s0001	4.2.1.78	EC	(S)-norcoclaurine synthase.
Thupl.28443579s0001	SignalP-noTM	SIGNALP
Thupl.28443579s0001	GO:0048544	GO	recognition of pollen
Thupl.28443579s0001	PF01453	PFAM	D-mannose binding lectin
Thupl.28443579s0001	PF00954	PFAM	S-locus glycoprotein family
Thupl.28443579s0001	PF08276	PFAM	PAN-like domain
Thupl.28443579s0001	PTHR44011	PANTHER
Thupl.28445139s0001	PTHR44369	PANTHER
Thupl.28445139s0001	PTHR44369:SF2	PANTHER
Thupl.28445139s0001	PF00385	PFAM	Chromo (CHRromatin Organisation MOdifier) domain
Thupl.28445139s0001	2.7.7.7	EC	DNA-directed DNA polymerase.
Thupl.28446800s0001	GO:0020037	GO	heme binding
Thupl.28446800s0001	GO:0016705	GO	oxidoreductase activity, acting on paired donors, with incorporation or reduction of molecular oxygen
Thupl.28446800s0001	PTHR24298:SF336	PANTHER
Thupl.28446800s0001	KOG0156	KOG	Cytochrome P450 CYP2 subfamily
Thupl.28446800s0001	GO:0055114	GO	oxidation-reduction process
Thupl.28446800s0001	1.14.13.88	EC	Flavonoid 3',5'-hydroxylase.
Thupl.28446800s0001	GO:0005506	GO	iron ion binding
Thupl.28446800s0001	PF00067	PFAM	Cytochrome P450
Thupl.28446800s0001	PTHR24298	PANTHER	FAMILY NOT NAMED
Thupl.28446800s0001	K13083	KEGGORTH	cytochrome P450, family 75, subfamily A (flavonoid 3',5'-hydroxylase) [EC:1.14.13.88]
Thupl.28450216s0001	PF00115	PFAM	Cytochrome C and Quinol oxidase polypeptide I
Thupl.28450216s0001	GO:0020037	GO	heme binding
Thupl.28450216s0001	GO:0004129	GO	cytochrome-c oxidase activity
Thupl.28450216s0001	PTHR10422	PANTHER	CYTOCHROME C OXIDASE SUBUNIT 1
Thupl.28450216s0001	GO:0009055	GO	electron carrier activity
Thupl.28450216s0001	K02256	KEGGORTH	cytochrome c oxidase subunit I [EC:1.9.3.1]
Thupl.28450216s0001	GO:0055114	GO	oxidation-reduction process
Thupl.28450216s0001	GO:0016021	GO	integral to membrane
Thupl.28450216s0001	GO:0005506	GO	iron ion binding
Thupl.28450216s0001	GO:0009060	GO	aerobic respiration
Thupl.28452139s0001	GO:0006032	GO	chitin catabolic process
Thupl.28452139s0001	3.2.1.14	EC	Chitinase.
Thupl.28452139s0001	SignalP-noTM	SIGNALP
Thupl.28452139s0001	PF00182	PFAM	Chitinase class I
Thupl.28452139s0001	KOG4742	KOG	Predicted chitinase
Thupl.28452139s0001	GO:0016998	GO	cell wall macromolecule catabolic process
Thupl.28452139s0001	PTHR22595	PANTHER	CHITINASE-RELATED
Thupl.28452139s0001	PTHR22595:SF104	PANTHER
Thupl.28452139s0001	K01183	KEGGORTH	chitinase [EC:3.2.1.14]
Thupl.28452139s0001	GO:0004568	GO	chitinase activity
Thupl.28454432s0001	PF00067	PFAM	Cytochrome P450
Thupl.28454432s0001	GO:0016705	GO	oxidoreductase activity, acting on paired donors, with incorporation or reduction of molecular oxygen
Thupl.28454432s0001	GO:0020037	GO	heme binding
Thupl.28454432s0001	PTHR24282:SF25	PANTHER
Thupl.28454432s0001	PTHR24282	PANTHER	FAMILY NOT NAMED
Thupl.28454432s0001	GO:0055114	GO	oxidation-reduction process
Thupl.28454432s0001	GO:0005506	GO	iron ion binding
Thupl.28456470s0001	PTHR10366:SF404	PANTHER
Thupl.28456470s0001	PTHR10366	PANTHER	NAD DEPENDENT EPIMERASE/DEHYDRATASE
Thupl.28456470s0001	GO:0050662	GO	coenzyme binding
Thupl.28456470s0001	GO:0003824	GO	catalytic activity
Thupl.28456470s0001	PF01370	PFAM	NAD dependent epimerase/dehydratase family
Thupl.28460959s0001	PF01582	PFAM	TIR domain
Thupl.28460959s0001	GO:0005515	GO	protein binding
Thupl.28460959s0001	GO:0007165	GO	signal transduction
Thupl.28460959s0001	PTHR11017	PANTHER	LEUCINE-RICH REPEAT-CONTAINING PROTEIN
Thupl.28460959s0002	GO:0043531	GO	ADP binding
Thupl.28460959s0002	PTHR11017	PANTHER	LEUCINE-RICH REPEAT-CONTAINING PROTEIN
Thupl.28460959s0002	PF00931	PFAM	NB-ARC domain
Thupl.28462401s0001	SignalP-noTM	SIGNALP
Thupl.28463479s0001	PTHR22298:SF36	PANTHER
Thupl.28463479s0001	GO:0004553	GO	hydrolase activity, hydrolyzing O-glycosyl compounds
Thupl.28463479s0001	3.2.1.4	EC	Cellulase.
Thupl.28463479s0001	GO:0005975	GO	carbohydrate metabolic process
Thupl.28463479s0001	PTHR22298	PANTHER	ENDO-1,4-BETA-GLUCANASE
Thupl.28463479s0001	PF00759	PFAM	Glycosyl hydrolase family 9
Thupl.28464356s0001	PF14547	PFAM	Hydrophobic seed protein
Thupl.28464356s0001	PTHR31731:SF16	PANTHER
Thupl.28464356s0001	SignalP-noTM	SIGNALP
Thupl.28464356s0001	PTHR31731	PANTHER	FAMILY NOT NAMED
Thupl.28467648s0001	PTHR43671	PANTHER
Thupl.28467648s0001	2.7.11.1	EC	Non-specific serine/threonine protein kinase.
Thupl.28467648s0001	PTHR43671:SF8	PANTHER
Thupl.28470348s0001	PF02891	PFAM	MIZ/SP-RING zinc finger
Thupl.28470348s0001	GO:0008270	GO	zinc ion binding
Thupl.28472080s0001	PTHR32166	PANTHER	FAMILY NOT NAMED
Thupl.28472080s0001	PF04937	PFAM	Protein of unknown function (DUF 659)
Thupl.28472335s0001	PTHR24089	PANTHER	FAMILY NOT NAMED
Thupl.28472335s0001	PF00153	PFAM	Mitochondrial carrier protein
Thupl.28472335s0001	PTHR24089:SF396	PANTHER
Thupl.28473389s0001	GO:0016788	GO	hydrolase activity, acting on ester bonds
Thupl.28473389s0001	PTHR22835:SF330	PANTHER
Thupl.28473389s0001	PTHR22835	PANTHER	ZINC FINGER FYVE DOMAIN CONTAINING PROTEIN
Thupl.28473389s0001	3.1.1.3	EC	Triacylglycerol lipase.
Thupl.28473389s0001	PF00657	PFAM	GDSL-like Lipase/Acylhydrolase
Thupl.28477215s0001	PTHR23163	PANTHER	RING FINGER PROTEIN-RELATED
Thupl.28477215s0001	PF13920	PFAM	Zinc finger, C3HC4 type (RING finger)
Thupl.28477215s0001	6.3.2.19	EC	Ubiquitin--protein ligase.
Thupl.28477215s0001	PTHR23163:SF3	PANTHER	UNCHARACTERIZED
Thupl.2847776s0001	K02711	KEGGORTH	photosystem II PsbJ protein
Thupl.2847776s0001	GO:0009539	GO	photosystem II reaction center
Thupl.2847776s0001	GO:0015979	GO	photosynthesis
Thupl.2847776s0001	GO:0016020	GO	membrane
Thupl.2847776s0001	PTHR34812	PANTHER
Thupl.2847776s0001	GO:0009523	GO	photosystem II
Thupl.2847776s0001	PF01788	PFAM	PsbJ
Thupl.28478371s0001	KOG0157	KOG	Cytochrome P450 CYP4/CYP19/CYP26 subfamilies
Thupl.28478371s0001	GO:0020037	GO	heme binding
Thupl.28478371s0001	GO:0016705	GO	oxidoreductase activity, acting on paired donors, with incorporation or reduction of molecular oxygen
Thupl.28478371s0001	1.14.15.3	EC	Alkane 1-monooxygenase.
Thupl.28478371s0001	PTHR24296	PANTHER	FAMILY NOT NAMED
Thupl.28478371s0001	GO:0055114	GO	oxidation-reduction process
Thupl.28478371s0001	GO:0005506	GO	iron ion binding
Thupl.28478371s0001	PF00067	PFAM	Cytochrome P450
Thupl.28478371s0001	PTHR24296:SF2	PANTHER
Thupl.284791983s0001	PF10266	PFAM	Hereditary spastic paraplegia protein strumpellin
Thupl.284791983s0001	PTHR15691	PANTHER	PROTEIN KIAA0196
Thupl.284791983s0001	GO:0071203	GO	WASH complex
Thupl.28482715s0001	PTHR11945	PANTHER	MADS BOX PROTEIN
Thupl.28482715s0001	PF00319	PFAM	SRF-type transcription factor (DNA-binding and dimerisation domain)
Thupl.28482715s0001	GO:0003677	GO	DNA binding
Thupl.28482715s0001	GO:0046983	GO	protein dimerization activity
Thupl.28482715s0001	PTHR11945:SF172	PANTHER
Thupl.28483123s0001	GO:0006468	GO	protein phosphorylation
Thupl.28483123s0001	GO:0005524	GO	ATP binding
Thupl.28483123s0001	PTHR27007	PANTHER
Thupl.28483123s0001	PTHR27007:SF75	PANTHER
Thupl.28483123s0001	GO:0030246	GO	carbohydrate binding
Thupl.28483123s0001	PF00069	PFAM	Protein kinase domain
Thupl.28483123s0001	KOG1187	KOG	Serine/threonine protein kinase
Thupl.28483123s0001	2.7.11.1	EC	Non-specific serine/threonine protein kinase.
Thupl.28483123s0001	GO:0004672	GO	protein kinase activity
Thupl.28483123s0001	PF00139	PFAM	Legume lectin domain
Thupl.28483150s0001	2.1.1.60	EC	Calmodulin-lysine N-methyltransferase.
Thupl.28483150s0001	PTHR23108	PANTHER	METHYLTRANSFERASE-RELATED
Thupl.28483150s0001	PTHR23108:SF2	PANTHER	gb def: Hypothetical protein At2g26810
Thupl.28483834s0001	PTHR11938:SF94	PANTHER
Thupl.28483834s0001	GO:0055114	GO	oxidation-reduction process
Thupl.28483834s0001	PTHR11938	PANTHER	FAD NADPH DEHYDROGENASE/OXIDOREDUCTASE
Thupl.28483834s0001	GO:0016491	GO	oxidoreductase activity
Thupl.28483834s0001	1.4.7.1	EC	Glutamate synthase (ferredoxin).
Thupl.28483834s0001	GO:0008152	GO	metabolic process
Thupl.28483834s0001	PF01493	PFAM	GXGXG motif
Thupl.28486184s0001	PTHR24015:SF607	PANTHER
Thupl.28486184s0001	PF01535	PFAM	PPR repeat
Thupl.28486184s0001	PF13041	PFAM	PPR repeat family
Thupl.28486184s0001	PTHR24015	PANTHER	FAMILY NOT NAMED
Thupl.28486477s0001	PTHR24128:SF35	PANTHER
Thupl.28486477s0001	KOG4412	KOG	26S proteasome regulatory complex, subunit PSMD10
Thupl.28486477s0001	PTHR24128	PANTHER	FAMILY NOT NAMED
Thupl.28486477s0001	K19044	KEGGORTH
Thupl.28486477s0001	PF12796	PFAM	Ankyrin repeats (3 copies)
Thupl.28490764s0001	PTHR33021	PANTHER
Thupl.28490764s0001	SignalP-noTM	SIGNALP
Thupl.28490764s0001	GO:0009055	GO	electron carrier activity
Thupl.28490764s0001	PTHR33021:SF60	PANTHER
Thupl.28490764s0001	PF02298	PFAM	Plastocyanin-like domain
Thupl.28491679s0001	PTHR43089	PANTHER
Thupl.28491679s0001	GO:0005524	GO	ATP binding
Thupl.28491679s0001	K02132	KEGGORTH	F-type H+-transporting ATPase subunit alpha [EC:3.6.3.14]
Thupl.28491679s0001	PF00306	PFAM	ATP synthase alpha/beta chain, C terminal domain
Thupl.28491679s0001	KOG1353	KOG	F0F1-type ATP synthase, alpha subunit
Thupl.28491679s0001	3.6.3.14	EC	H(+)-transporting two-sector ATPase.
Thupl.28491679s0001	GO:0015986	GO	ATP synthesis coupled proton transport
Thupl.28491679s0001	PF00006	PFAM	ATP synthase alpha/beta family, nucleotide-binding domain
Thupl.28493688s0001	PTHR12305:SF80	PANTHER
Thupl.28493688s0001	3.1.3.67	EC	Phosphatidylinositol-3,4,5-trisphosphate 3-phosphatase.
Thupl.28493688s0001	PTHR12305	PANTHER	PHOSPHATASE WITH HOMOLOGY TO TENSIN
Thupl.28496687s0001	PTHR33047	PANTHER
Thupl.28497963s0001	2.5.1.18	EC	Glutathione transferase.
Thupl.28497963s0001	PF00043	PFAM	Glutathione S-transferase, C-terminal domain
Thupl.28497963s0001	PF02798	PFAM	Glutathione S-transferase, N-terminal domain
Thupl.28497963s0001	KOG0867	KOG	Glutathione S-transferase
Thupl.28497963s0001	GO:0005515	GO	protein binding
Thupl.28497963s0001	PTHR43900	PANTHER
Thupl.28497963s0001	K00799	KEGGORTH	glutathione S-transferase [EC:2.5.1.18]
Thupl.28498092s0001	PTHR34047	PANTHER
Thupl.28498092s0001	PTHR34047:SF1	PANTHER
Thupl.28498323s0001	PTHR43507:SF6	PANTHER
Thupl.28498323s0001	PF00361	PFAM	NADH-Ubiquinone/plastoquinone (complex I), various chains
Thupl.28498323s0001	GO:0055114	GO	oxidation-reduction process
Thupl.28498323s0001	GO:0042773	GO	ATP synthesis coupled electron transport
Thupl.28498323s0001	1.6.5.3	EC	NADH:ubiquinone reductase (H(+)-translocating).
Thupl.28498323s0001	PTHR43507	PANTHER
Thupl.28498323s0001	GO:0008137	GO	NADH dehydrogenase (ubiquinone) activity
Thupl.28498395s0001	GO:0043531	GO	ADP binding
Thupl.28498395s0001	PTHR44056	PANTHER
Thupl.28498395s0001	PTHR44056:SF1	PANTHER
Thupl.28498395s0001	PF00931	PFAM	NB-ARC domain
Thupl.28499031s0001	PTHR45177	PANTHER
Thupl.28499150s0001	GO:0005524	GO	ATP binding
Thupl.28499150s0001	GO:0006468	GO	protein phosphorylation
Thupl.28499150s0001	PTHR27002:SF196	PANTHER
Thupl.28499150s0001	GO:0004672	GO	protein kinase activity
Thupl.28499150s0001	2.7.11.1	EC	Non-specific serine/threonine protein kinase.
Thupl.28499150s0001	PTHR27002	PANTHER
Thupl.28499150s0001	KOG1187	KOG	Serine/threonine protein kinase
Thupl.28499150s0001	PF00069	PFAM	Protein kinase domain
Thupl.28503057s0001	PTHR23310:SF96	PANTHER
Thupl.28503057s0001	GO:0000062	GO	fatty-acyl-CoA binding
Thupl.28503057s0001	PF00887	PFAM	Acyl CoA binding protein
Thupl.28503057s0001	PTHR23310	PANTHER	ACYL-COA-BINDING PROTEIN, ACBP
Thupl.28503057s0001	KOG0817	KOG	Acyl-CoA-binding protein
Thupl.28503497s0001	PTHR13878	PANTHER	GULONOLACTONE OXIDASE
Thupl.28503497s0001	PTHR13878:SF90	PANTHER
Thupl.28503497s0001	SignalP-noTM	SIGNALP
Thupl.28503497s0001	PF01565	PFAM	FAD binding domain
Thupl.28503497s0001	GO:0016491	GO	oxidoreductase activity
Thupl.28503497s0001	GO:0050660	GO	flavin adenine dinucleotide binding
Thupl.28503497s0001	GO:0055114	GO	oxidation-reduction process
Thupl.28503497s0001	1.1.3.8	EC	L-gulonolactone oxidase.
Thupl.28506153s0001	PF01582	PFAM	TIR domain
Thupl.28506153s0001	GO:0005515	GO	protein binding
Thupl.28506153s0001	PF00931	PFAM	NB-ARC domain
Thupl.28506153s0001	GO:0007165	GO	signal transduction
Thupl.28506153s0001	GO:0043531	GO	ADP binding
Thupl.28506153s0001	PTHR11017	PANTHER	LEUCINE-RICH REPEAT-CONTAINING PROTEIN
Thupl.28508080s0001	PTHR24296:SF4	PANTHER
Thupl.28508080s0001	GO:0016705	GO	oxidoreductase activity, acting on paired donors, with incorporation or reduction of molecular oxygen
Thupl.28508080s0001	GO:0020037	GO	heme binding
Thupl.28508080s0001	KOG0157	KOG	Cytochrome P450 CYP4/CYP19/CYP26 subfamilies
Thupl.28508080s0001	1.14.13.109	EC	Abieta-7,13-dien-18-ol hydroxylase.
Thupl.28508080s0001	GO:0055114	GO	oxidation-reduction process
Thupl.28508080s0001	PTHR24296	PANTHER	FAMILY NOT NAMED
Thupl.28508080s0001	GO:0005506	GO	iron ion binding
Thupl.28508080s0001	PF00067	PFAM	Cytochrome P450
Thupl.28508277s0001	PTHR10641:SF510	PANTHER
Thupl.28508277s0001	PTHR10641	PANTHER	MYB-LIKE DNA-BINDING PROTEIN MYB
Thupl.28508277s0001	PF00249	PFAM	Myb-like DNA-binding domain
Thupl.28509900s0001	GO:0016887	GO	ATPase activity
Thupl.28509900s0001	GO:0055085	GO	transmembrane transport
Thupl.28509900s0001	GO:0005524	GO	ATP binding
Thupl.28509900s0001	GO:0006810	GO	transport
Thupl.28509900s0001	PTHR24221:SF381	PANTHER
Thupl.28509900s0001	GO:0042626	GO	ATPase activity, coupled to transmembrane movement of substances
Thupl.28509900s0001	KOG0058	KOG	Peptide exporter, ABC superfamily
Thupl.28509900s0001	GO:0016021	GO	integral to membrane
Thupl.28509900s0001	PF00005	PFAM	ABC transporter
Thupl.28509900s0001	PF00664	PFAM	ABC transporter transmembrane region
Thupl.28509900s0001	PTHR24221	PANTHER	FAMILY NOT NAMED
Thupl.28511090s0001	2.7.11.1	EC	Non-specific serine/threonine protein kinase.
Thupl.28511090s0001	PTHR27002	PANTHER
Thupl.28511090s0001	PTHR27002:SF150	PANTHER
Thupl.28511856s0001	PF07714	PFAM	Protein tyrosine kinase
Thupl.28511856s0001	2.7.11.1	EC	Non-specific serine/threonine protein kinase.
Thupl.28511856s0001	GO:0004672	GO	protein kinase activity
Thupl.28511856s0001	GO:0006468	GO	protein phosphorylation
Thupl.28511856s0001	KOG0580	KOG	Serine/threonine protein kinase
Thupl.28511856s0001	PF01657	PFAM	Salt stress response/antifungal
Thupl.28511856s0001	PTHR27006:SF30	PANTHER
Thupl.28511856s0001	PTHR27006	PANTHER
Thupl.28512578s0001	GO:0004553	GO	hydrolase activity, hydrolyzing O-glycosyl compounds
Thupl.28512578s0001	PTHR31451	PANTHER	FAMILY NOT NAMED
Thupl.28512578s0001	GO:0005975	GO	carbohydrate metabolic process
Thupl.28512578s0001	PF00150	PFAM	Cellulase (glycosyl hydrolase family 5)
Thupl.28512578s0001	PTHR31451:SF17	PANTHER
Thupl.28512578s0001	3.2.1.78	EC	Mannan endo-1,4-beta-mannosidase.
Thupl.28513541s0001	PTHR13068	PANTHER	CGI-12 PROTEIN-RELATED
Thupl.28513541s0001	GO:0006355	GO	regulation of transcription, DNA-dependent
Thupl.28513541s0001	PF02536	PFAM	mTERF
Thupl.28513541s0001	GO:0003690	GO	double-stranded DNA binding
Thupl.28514398s0001	PTHR10516	PANTHER	PEPTIDYL-PROLYL CIS-TRANS ISOMERASE
Thupl.28514398s0001	PTHR10516:SF308	PANTHER
Thupl.28514398s0001	5.2.1.8	EC	Peptidylprolyl isomerase.
Thupl.28514398s0001	PF00254	PFAM	FKBP-type peptidyl-prolyl cis-trans isomerase
Thupl.28514398s0001	KOG0552	KOG	FKBP-type peptidyl-prolyl cis-trans isomerase
Thupl.28515628s0001	PF01494	PFAM	FAD binding domain
Thupl.28515628s0001	GO:0071949	GO	FAD binding
Thupl.28515628s0001	PTHR13789	PANTHER	MONOOXYGENASE
Thupl.28515628s0001	PTHR13789:SF185	PANTHER
Thupl.28516380s0001	SignalP-noTM	SIGNALP
Thupl.28516708s0001	PF00067	PFAM	Cytochrome P450
Thupl.28516708s0001	PTHR24298	PANTHER	FAMILY NOT NAMED
Thupl.28516708s0001	1.14.13.109	EC	Abieta-7,13-dien-18-ol hydroxylase.
Thupl.28516708s0001	GO:0020037	GO	heme binding
Thupl.28516708s0001	GO:0016705	GO	oxidoreductase activity, acting on paired donors, with incorporation or reduction of molecular oxygen
Thupl.28516708s0001	GO:0005506	GO	iron ion binding
Thupl.28516708s0001	GO:0055114	GO	oxidation-reduction process
Thupl.28517552s0001	PTHR24279	PANTHER	FAMILY NOT NAMED
Thupl.28517552s0001	1.14.13.78	EC	Ent-kaurene oxidase.
Thupl.28517552s0001	PTHR24279:SF57	PANTHER
Thupl.28517571s0001	PTHR33232	PANTHER
Thupl.28518113s0001	SignalP-noTM	SIGNALP
Thupl.28518113s0001	PTHR27004	PANTHER
Thupl.28518113s0001	PF13855	PFAM	Leucine rich repeat
Thupl.28518113s0001	PF08263	PFAM	Leucine rich repeat N-terminal domain
Thupl.28518113s0001	KOG0472	KOG	Leucine-rich repeat protein
Thupl.28518113s0001	GO:0005515	GO	protein binding
Thupl.28518532s0001	PTHR11538	PANTHER	PHENYLALANYL-TRNA SYNTHETASE
Thupl.28518532s0001	KOG4174	KOG	Uncharacterized conserved protein
Thupl.28518532s0001	PF10354	PFAM	Domain of unknown function (DUF2431)
Thupl.28518532s0001	PTHR11538:SF54	PANTHER
Thupl.28518532s0001	K19307	KEGGORTH
Thupl.28519658s0001	PF00941	PFAM	FAD binding domain in molybdopterin dehydrogenase
Thupl.28519658s0001	SignalP-noTM	SIGNALP
Thupl.28519658s0001	PTHR11908:SF100	PANTHER
Thupl.28519658s0001	1.2.3.1	EC	Aldehyde oxidase.
Thupl.28519658s0001	GO:0055114	GO	oxidation-reduction process
Thupl.28519658s0001	PTHR11908	PANTHER	XANTHINE DEHYDROGENASE
Thupl.28519658s0001	GO:0016491	GO	oxidoreductase activity
Thupl.28521796s0001	PTHR33927:SF1	PANTHER
Thupl.28521796s0001	PTHR33927	PANTHER
Thupl.28522865s0001	2.7.13.3	EC	Histidine kinase.
Thupl.28522865s0001	PF00072	PFAM	Response regulator receiver domain
Thupl.28522865s0001	GO:0000160	GO	phosphorelay signal transduction system
Thupl.28522865s0001	PTHR43719:SF16	PANTHER
Thupl.28522865s0001	PTHR43719	PANTHER
Thupl.28523303s0001	PTHR43886	PANTHER
Thupl.28523303s0001	PF13855	PFAM	Leucine rich repeat
Thupl.28523303s0001	GO:0005515	GO	protein binding
Thupl.28524713s0001	PTHR10953:SF6	PANTHER	UBIQUITIN-ACTIVATING ENZYME E1C (NEDD8-ACTIVATING ENZYME E1 CATALYTIC SUBUNIT)
Thupl.28524713s0001	GO:0016881	GO	acid-amino acid ligase activity
Thupl.28524713s0001	PF08825	PFAM	E2 binding domain
Thupl.28524713s0001	GO:0045116	GO	protein neddylation
Thupl.28524713s0001	GO:0019781	GO	NEDD8 activating enzyme activity
Thupl.28524713s0001	GO:0005524	GO	ATP binding
Thupl.28524713s0001	PTHR10953	PANTHER	UBIQUITIN-ACTIVATING ENZYME E1
Thupl.28525055s0001	PF01494	PFAM	FAD binding domain
Thupl.28525055s0001	PTHR13789	PANTHER	MONOOXYGENASE
Thupl.28525055s0001	PTHR13789:SF213	PANTHER
Thupl.28525055s0001	GO:0071949	GO	FAD binding
Thupl.28526362s0001	PF01582	PFAM	TIR domain
Thupl.28526362s0001	GO:0005515	GO	protein binding
Thupl.28526362s0001	GO:0007165	GO	signal transduction
Thupl.28526362s0001	PTHR11017	PANTHER	LEUCINE-RICH REPEAT-CONTAINING PROTEIN
Thupl.28527093s0001	GO:0006338	GO	chromatin remodeling
Thupl.28527093s0001	K11662	KEGGORTH	actin-related protein 6
Thupl.28527093s0001	PTHR11937:SF47	PANTHER	SUBFAMILY NOT NAMED
Thupl.28527093s0001	PF00022	PFAM	Actin
Thupl.28527093s0001	GO:0005634	GO	nucleus
Thupl.28527093s0001	PTHR11937	PANTHER	ACTIN
Thupl.28533511s0001	PTHR14083	PANTHER	YIP1 INTERACTING FACTOR HOMOLOG (YIF1 PROTEIN)
Thupl.28533511s0001	PTHR14083:SF6	PANTHER
Thupl.28533511s0001	PF03878	PFAM	YIF1
Thupl.28534013s0001	PTHR23081	PANTHER	RNA POLYMERASE II CTD PHOSPHATASE
Thupl.28534013s0001	PTHR23081:SF17	PANTHER
Thupl.28534013s0001	3.1.3.16	EC	Phosphoprotein phosphatase.
Thupl.28535622s0001	PTHR31399	PANTHER	FAMILY NOT NAMED
Thupl.28536438s0001	PF03813	PFAM	Nrap protein
Thupl.28536438s0001	PTHR17972	PANTHER	NUCLEOLAR RNA-ASSOCIATED PROTEIN
Thupl.28536844s0001	PTHR22595:SF71	PANTHER
Thupl.28536844s0001	GO:0050832	GO	defense response to fungus
Thupl.28536844s0001	PTHR22595	PANTHER	CHITINASE-RELATED
Thupl.28536844s0001	GO:0042742	GO	defense response to bacterium
Thupl.28536844s0001	PF00967	PFAM	Barwin family
Thupl.28536844s0001	SignalP-noTM	SIGNALP
Thupl.28538127s0001	GO:0005524	GO	ATP binding
Thupl.28538127s0001	PTHR27000	PANTHER
Thupl.28538127s0001	GO:0005515	GO	protein binding
Thupl.28538127s0001	GO:0006468	GO	protein phosphorylation
Thupl.28538127s0001	PF08263	PFAM	Leucine rich repeat N-terminal domain
Thupl.28538127s0001	PF00560	PFAM	Leucine Rich Repeat
Thupl.28538127s0001	2.7.11.1	EC	Non-specific serine/threonine protein kinase.
Thupl.28538127s0001	GO:0004672	GO	protein kinase activity
Thupl.28538127s0001	SignalP-noTM	SIGNALP
Thupl.28538127s0001	PF13855	PFAM	Leucine rich repeat
Thupl.28538127s0001	PF00069	PFAM	Protein kinase domain
Thupl.28538127s0001	KOG1187	KOG	Serine/threonine protein kinase
Thupl.28538127s0001	PTHR27000:SF219	PANTHER
Thupl.28539241s0001	GO:0005524	GO	ATP binding
Thupl.28539241s0001	PTHR10799:SF926	PANTHER
Thupl.28539241s0001	3.6.4.12	EC	DNA helicase.
Thupl.28539241s0001	PTHR10799	PANTHER	SWI/SNF-RELATED MATRIX-ASSOCIATED ACTIN-DEPENDENT REGULATOR OF CHROMATIN SUBFAMILY-RELATED
Thupl.28539241s0001	PF00176	PFAM	SNF2 family N-terminal domain
Thupl.28541923s0001	3.6.4.12	EC	DNA helicase.
Thupl.28541923s0001	K18663	KEGGORTH
Thupl.28541923s0001	PTHR24075	PANTHER	FAMILY NOT NAMED
Thupl.28541923s0001	PF00271	PFAM	Helicase conserved C-terminal domain
Thupl.28541923s0001	PTHR24075:SF6	PANTHER
Thupl.28542551s0001	PTHR22952:SF47	PANTHER	OS01G0808100 PROTEIN
Thupl.28542551s0001	PTHR22952	PANTHER	CAMP-RESPONSE ELEMENT BINDING PROTEIN-RELATED
Thupl.28543337s0001	2.7.11.1	EC	Non-specific serine/threonine protein kinase.
Thupl.28543337s0001	PTHR27008	PANTHER
Thupl.28543337s0001	PTHR27008:SF109	PANTHER
Thupl.28546760s0002	PTHR36787	PANTHER
Thupl.28547116s0001	PTHR44695	PANTHER
Thupl.28547116s0001	2.7.7.49	EC	RNA-directed DNA polymerase.
Thupl.28548730s0001	SignalP-noTM	SIGNALP
Thupl.28548730s0001	PF13855	PFAM	Leucine rich repeat
Thupl.28548730s0001	2.7.11.1	EC	Non-specific serine/threonine protein kinase.
Thupl.28548730s0001	PF00560	PFAM	Leucine Rich Repeat
Thupl.28548730s0001	PF08263	PFAM	Leucine rich repeat N-terminal domain
Thupl.28548730s0001	KOG0472	KOG	Leucine-rich repeat protein
Thupl.28548730s0001	PTHR27000	PANTHER
Thupl.28548730s0001	GO:0005515	GO	protein binding
Thupl.28550711s0001	1.3.7.7	EC	Ferredoxin:protochlorophyllide reductase (ATP-dependent).
Thupl.28550711s0001	GO:0055114	GO	oxidation-reduction process
Thupl.28550711s0001	PTHR33712:SF1	PANTHER
Thupl.28550711s0001	PTHR33712	PANTHER
Thupl.28550711s0001	PF00148	PFAM	Nitrogenase component 1 type Oxidoreductase
Thupl.28550711s0001	GO:0016491	GO	oxidoreductase activity
Thupl.28552192s0001	PTHR11629	PANTHER	VACUOLAR PROTON ATPASES
Thupl.28552192s0001	GO:0015078	GO	hydrogen ion transmembrane transporter activity
Thupl.28552192s0001	PTHR11629:SF72	PANTHER
Thupl.28552192s0001	GO:0033179	GO	proton-transporting V-type ATPase, V0 domain
Thupl.28552192s0001	GO:0015991	GO	ATP hydrolysis coupled proton transport
Thupl.28552996s0001	PTHR31636	PANTHER	FAMILY NOT NAMED
Thupl.28552996s0001	PF03514	PFAM	GRAS domain family
Thupl.28552996s0001	PTHR31636:SF40	PANTHER
Thupl.28553397s0001	PTHR10799	PANTHER	SWI/SNF-RELATED MATRIX-ASSOCIATED ACTIN-DEPENDENT REGULATOR OF CHROMATIN SUBFAMILY-RELATED
Thupl.28553397s0001	3.6.4.11	EC	Nucleoplasmin ATPase.
Thupl.28553397s0001	PTHR10799:SF873	PANTHER
Thupl.28553750s0001	PTHR31346	PANTHER	FAMILY NOT NAMED
Thupl.28553750s0001	PTHR31346:SF5	PANTHER
Thupl.28553977s0001	3.4.21.92	EC	Endopeptidase Clp.
Thupl.28553977s0001	PTHR10381	PANTHER	ATP-DEPENDENT CLP PROTEASE PROTEOLYTIC SUBUNIT
Thupl.28553977s0001	PF00574	PFAM	Clp protease
Thupl.28553977s0001	K01358	KEGGORTH	ATP-dependent Clp protease, protease subunit [EC:3.4.21.92]
Thupl.28554794s0001	GO:0006457	GO	protein folding
Thupl.28554794s0001	PTHR10772	PANTHER	10 KDA HEAT SHOCK PROTEIN
Thupl.28554794s0001	PTHR10772:SF13	PANTHER
Thupl.28554794s0001	GO:0005737	GO	cytoplasm
Thupl.28554794s0001	PF00166	PFAM	Chaperonin 10 Kd subunit
Thupl.28554794s0002	PTHR33639:SF2	PANTHER
Thupl.28554794s0002	PTHR33639	PANTHER
Thupl.28554794s0002	PF04134	PFAM	Protein of unknown function, DUF393
Thupl.28555131s0001	2.7.11.1	EC	Non-specific serine/threonine protein kinase.
Thupl.28555131s0001	SignalP-noTM	SIGNALP
Thupl.28555131s0001	PTHR32080	PANTHER	FAMILY NOT NAMED
Thupl.28555131s0001	PTHR32080:SF11	PANTHER
Thupl.28555131s0001	PF01657	PFAM	Salt stress response/antifungal
Thupl.28562036s0001	PTHR42665:SF4	PANTHER
Thupl.28562036s0001	1.4.3.10	EC	Putrescine oxidase.
Thupl.28562036s0001	GO:0055114	GO	oxidation-reduction process
Thupl.28562036s0001	PTHR42665	PANTHER
Thupl.28562036s0001	GO:0016491	GO	oxidoreductase activity
Thupl.28562036s0001	PF01593	PFAM	Flavin containing amine oxidoreductase
Thupl.28562679s0001	GO:0015979	GO	photosynthesis
Thupl.28562679s0001	GO:0009522	GO	photosystem I
Thupl.28562679s0001	PTHR36082:SF2	PANTHER
Thupl.28562679s0001	PF01701	PFAM	Photosystem I reaction centre subunit IX / PsaJ
Thupl.28562679s0001	PTHR36082	PANTHER
Thupl.28562679s0002	PTHR35516	PANTHER
Thupl.28562679s0002	PF02529	PFAM	Cytochrome B6-F complex subunit 5
Thupl.28562679s0002	PTHR35516:SF1	PANTHER
Thupl.28562679s0002	K02640	KEGGORTH	cytochrome b6-f complex subunit 5
Thupl.28562679s0002	GO:0009512	GO	cytochrome b6f complex
Thupl.28562679s0004	GO:0009055	GO	electron carrier activity
Thupl.28562679s0004	GO:0022900	GO	electron transport chain
Thupl.28562679s0004	PTHR19271	PANTHER	CYTOCHROME B
Thupl.28562679s0004	GO:0020037	GO	heme binding
Thupl.28562679s0004	GO:0016020	GO	membrane
Thupl.28562679s0004	PTHR19271:SF8	PANTHER
Thupl.28562679s0004	GO:0016491	GO	oxidoreductase activity
Thupl.28562679s0004	GO:0016021	GO	integral to membrane
Thupl.28562679s0004	GO:0005506	GO	iron ion binding
Thupl.28562679s0004	PF00033	PFAM	Cytochrome b(N-terminal)/b6/petB
Thupl.28562679s0004	GO:0045158	GO	electron transporter, transferring electrons within cytochrome b6/f complex of photosystem II activity
Thupl.28563112s0001	PF00557	PFAM	Metallopeptidase family M24
Thupl.28563112s0001	PTHR43226:SF1	PANTHER
Thupl.28563112s0001	PTHR43226	PANTHER
Thupl.28563112s0001	3.4.13.9	EC	Xaa-Pro dipeptidase.
Thupl.28564583s0001	PTHR31704	PANTHER	FAMILY NOT NAMED
Thupl.28564583s0001	PF12776	PFAM	Myb/SANT-like DNA-binding domain
Thupl.28567598s0001	GO:0006468	GO	protein phosphorylation
Thupl.28567598s0001	KOG0610	KOG	Putative serine/threonine protein kinase
Thupl.28567598s0001	GO:0005524	GO	ATP binding
Thupl.28567598s0001	PF00069	PFAM	Protein kinase domain
Thupl.28567598s0001	PTHR24351:SF107	PANTHER
Thupl.28567598s0001	PTHR24351	PANTHER	RIBOSOMAL PROTEIN S6 KINASE
Thupl.28567598s0001	GO:0004672	GO	protein kinase activity
Thupl.28567598s0001	2.7.11.1	EC	Non-specific serine/threonine protein kinase.
Thupl.28568399s0001	PTHR36316	PANTHER
Thupl.28569938s0001	PTHR26312	PANTHER	FAMILY NOT NAMED
Thupl.28569938s0001	PTHR26312:SF81	PANTHER
Thupl.28569938s0002	GO:0009539	GO	photosystem II reaction center
Thupl.28569938s0002	K02715	KEGGORTH	PsbN protein
Thupl.28569938s0002	GO:0015979	GO	photosynthesis
Thupl.28569938s0002	GO:0016020	GO	membrane
Thupl.28569938s0002	PF02468	PFAM	Photosystem II reaction centre N protein (psbN)
Thupl.28569938s0002	GO:0009523	GO	photosystem II
Thupl.28569938s0002	PTHR35326	PANTHER
Thupl.28569938s0002	PTHR35326:SF2	PANTHER
Thupl.28569938s0003	GO:0009523	GO	photosystem II
Thupl.28569938s0003	GO:0016020	GO	membrane
Thupl.28569938s0003	GO:0015979	GO	photosynthesis
Thupl.28569938s0003	GO:0042301	GO	phosphate ion binding
Thupl.28569938s0003	PF00737	PFAM	Photosystem II 10 kDa phosphoprotein
Thupl.28569938s0003	GO:0050821	GO	protein stabilization
Thupl.28571438s0001	PTHR31945	PANTHER	FAMILY NOT NAMED
Thupl.28572789s0001	PTHR11017	PANTHER	LEUCINE-RICH REPEAT-CONTAINING PROTEIN
Thupl.28572789s0001	GO:0043531	GO	ADP binding
Thupl.28572789s0001	PF00931	PFAM	NB-ARC domain
Thupl.28576502s0001	GO:0032549	GO	ribonucleoside binding
Thupl.28576502s0001	PF00562	PFAM	RNA polymerase Rpb2, domain 6
Thupl.28576502s0001	GO:0003899	GO	DNA-directed RNA polymerase activity
Thupl.28576502s0001	GO:0006351	GO	transcription, DNA-dependent
Thupl.28576502s0001	GO:0003677	GO	DNA binding
Thupl.28576502s0001	PTHR20856:SF20	PANTHER
Thupl.28576502s0001	PTHR20856	PANTHER	DNA-DIRECTED RNA POLYMERASE I SUBUNIT 2
Thupl.28576502s0001	2.7.7.6	EC	DNA-directed RNA polymerase.
Thupl.28578353s0001	PTHR22748:SF6	PANTHER
Thupl.28578353s0001	GO:0006281	GO	DNA repair
Thupl.28578353s0001	PTHR22748	PANTHER	AP ENDONUCLEASE
Thupl.28578353s0001	GO:0004518	GO	nuclease activity
Thupl.28579265s0001	PF13639	PFAM	Ring finger domain
Thupl.28579265s0001	PTHR14155	PANTHER	RING FINGER DOMAIN-CONTAINING
Thupl.28579265s0001	PTHR14155:SF257	PANTHER
Thupl.28579421s0001	K02261	KEGGORTH	cytochrome c oxidase subunit II [EC:1.9.3.1]
Thupl.28579421s0001	GO:0016020	GO	membrane
Thupl.28579421s0001	PTHR22888	PANTHER	CYTOCHROME C OXIDASE, SUBUNIT II
Thupl.28579421s0001	GO:0004129	GO	cytochrome-c oxidase activity
Thupl.28579421s0001	GO:0005507	GO	copper ion binding
Thupl.28579421s0001	PF00116	PFAM	Cytochrome C oxidase subunit II, periplasmic domain
Thupl.28579421s0001	PTHR22888:SF9	PANTHER
Thupl.28579421s0001	1.9.3.1	EC	Cytochrome-c oxidase.
Thupl.28580022s0001	PF00394	PFAM	Multicopper oxidase
Thupl.28580022s0001	GO:0055114	GO	oxidation-reduction process
Thupl.28580022s0001	PTHR11709	PANTHER	MULTI-COPPER OXIDASE
Thupl.28580022s0001	GO:0005507	GO	copper ion binding
Thupl.28580022s0001	GO:0016491	GO	oxidoreductase activity
Thupl.28580022s0001	PTHR11709:SF88	PANTHER
Thupl.28580022s0001	1.10.3.2	EC	Laccase.
Thupl.28580022s0001	PF07731	PFAM	Multicopper oxidase
Thupl.28580278s0001	GO:0016747	GO	transferase activity, transferring acyl groups other than amino-acyl groups
Thupl.28580278s0001	2.3.1.162	EC	Taxadien-5-alpha-ol O-acetyltransferase.
Thupl.28580278s0001	PF02458	PFAM	Transferase family
Thupl.28580278s0001	PTHR31147	PANTHER	FAMILY NOT NAMED
Thupl.28581233s0001	PTHR43930	PANTHER
Thupl.28581690s0001	PTHR44369:SF2	PANTHER
Thupl.28581690s0001	PTHR44369	PANTHER
Thupl.28581690s0001	2.7.7.7	EC	DNA-directed DNA polymerase.
Thupl.28583595s0001	PTHR33528:SF1	PANTHER
Thupl.28583595s0001	PTHR33528	PANTHER
Thupl.28583595s0001	PF15054	PFAM	Domain of unknown function (DUF4535)
Thupl.28583726s0001	PF14543	PFAM	Xylanase inhibitor N-terminal
Thupl.28583726s0001	PTHR13683	PANTHER	ASPARTYL PROTEASES
Thupl.28583726s0001	3.4.23.12	EC	Nepenthesin.
Thupl.28583726s0001	GO:0006508	GO	proteolysis
Thupl.28583726s0001	GO:0004190	GO	aspartic-type endopeptidase activity
Thupl.28583726s0001	PF14541	PFAM	Xylanase inhibitor C-terminal
Thupl.28583726s0001	KOG1339	KOG	Aspartyl protease
Thupl.28583726s0001	PTHR13683:SF223	PANTHER
Thupl.28585555s0001	PF00025	PFAM	ADP-ribosylation factor family
Thupl.28585555s0001	PTHR11711:SF203	PANTHER
Thupl.28585555s0001	PTHR11711	PANTHER	ADP RIBOSYLATION FACTOR-RELATED
Thupl.28585555s0001	GO:0005525	GO	GTP binding
Thupl.28585555s0001	KOG0077	KOG	Vesicle coat complex COPII, GTPase subunit SAR1
Thupl.28585584s0001	GO:0016021	GO	integral to membrane
Thupl.28585584s0001	GO:0015979	GO	photosynthesis
Thupl.28585584s0001	GO:0009579	GO	thylakoid
Thupl.28585584s0001	PTHR33288:SF4	PANTHER
Thupl.28585584s0001	PTHR33288	PANTHER
Thupl.28585584s0001	PF02392	PFAM	Ycf4
Thupl.28585584s0001	GO:0009522	GO	photosystem I
Thupl.28585584s0002	GO:0016168	GO	chlorophyll binding
Thupl.28585584s0002	GO:0009767	GO	photosynthetic electron transport chain
Thupl.28585584s0002	GO:0019684	GO	photosynthesis, light reaction
Thupl.28585584s0002	PTHR33180:SF5	PANTHER
Thupl.28585584s0002	PTHR33180	PANTHER
Thupl.28585584s0002	GO:0009521	GO	photosystem
Thupl.28585584s0002	GO:0016020	GO	membrane
Thupl.28585584s0002	PF00421	PFAM	Photosystem II protein
Thupl.28587139s0001	SignalP-noTM	SIGNALP
Thupl.28587581s0001	PTHR44381	PANTHER
Thupl.28587581s0001	2.7.7.49	EC	RNA-directed DNA polymerase.
Thupl.28587705s0001	GO:0006355	GO	regulation of transcription, DNA-dependent
Thupl.28587705s0001	GO:0046872	GO	metal ion binding
Thupl.28587705s0001	GO:0018024	GO	histone-lysine N-methyltransferase activity
Thupl.28587705s0001	GO:0034968	GO	histone lysine methylation
Thupl.28587705s0001	PF00642	PFAM	Zinc finger C-x8-C-x5-C-x3-H type (and similar)
Thupl.28587705s0001	PTHR36886	PANTHER
Thupl.28587705s0001	PF08236	PFAM	SRI (Set2 Rpb1 interacting) domain
Thupl.28587705s0001	GO:0005694	GO	chromosome
Thupl.28589158s0001	PTHR35481	PANTHER
Thupl.28589887s0001	GO:0006468	GO	protein phosphorylation
Thupl.28589887s0001	GO:0005524	GO	ATP binding
Thupl.28589887s0001	PTHR24349:SF180	PANTHER
Thupl.28589887s0001	KOG0032	KOG	Ca2+/calmodulin-dependent protein kinase, EF-Hand protein superfamily
Thupl.28589887s0001	PF00069	PFAM	Protein kinase domain
Thupl.28589887s0001	GO:0004672	GO	protein kinase activity
Thupl.28589887s0001	PTHR24349	PANTHER	SERINE/THREONINE-PROTEIN KINASE
Thupl.28589887s0001	2.7.11.1	EC	Non-specific serine/threonine protein kinase.
Thupl.28592358s0001	PTHR31625	PANTHER	FAMILY NOT NAMED
Thupl.28592358s0001	PF02458	PFAM	Transferase family
Thupl.28592358s0001	GO:0016747	GO	transferase activity, transferring acyl groups other than amino-acyl groups
Thupl.28592597s0001	K12842	KEGGORTH	U2-associated protein SR140
Thupl.28592597s0001	PF01805	PFAM	Surp module
Thupl.28592597s0001	PF08312	PFAM	cwf21 domain
Thupl.28592597s0001	GO:0003723	GO	RNA binding
Thupl.28592597s0001	GO:0006396	GO	RNA processing
Thupl.28592597s0001	PTHR23140	PANTHER	RNA PROCESSING PROTEIN LD23810P
Thupl.28592742s0001	PF14111	PFAM	Domain of unknown function (DUF4283)
Thupl.28592742s0001	PTHR45329	PANTHER
Thupl.28594926s0001	PTHR33428	PANTHER
Thupl.28594926s0001	GO:0015996	GO	chlorophyll catabolic process
Thupl.28594926s0001	3.1.1.14	EC	Chlorophyllase.
Thupl.28594926s0001	PF07224	PFAM	Chlorophyllase
Thupl.28594926s0001	GO:0047746	GO	chlorophyllase activity
Thupl.28595359s0001	3.2.1.15	EC	Polygalacturonase.
Thupl.28595359s0001	GO:0005975	GO	carbohydrate metabolic process
Thupl.28595359s0001	GO:0004650	GO	polygalacturonase activity
Thupl.28595359s0001	PTHR31375	PANTHER	FAMILY NOT NAMED
Thupl.28595359s0001	PF00295	PFAM	Glycosyl hydrolases family 28
Thupl.28598008s0001	PTHR13822	PANTHER	ATP SYNTHASE DELTA/EPSILON CHAIN
Thupl.28598008s0001	PTHR13822:SF8	PANTHER
Thupl.28598008s0001	GO:0015986	GO	ATP synthesis coupled proton transport
Thupl.28598008s0001	3.6.3.14	EC	H(+)-transporting two-sector ATPase.
Thupl.28598008s0001	PF02823	PFAM	ATP synthase, Delta/Epsilon chain, beta-sandwich domain
Thupl.28598008s0001	GO:0046933	GO	proton-transporting ATP synthase activity, rotational mechanism
Thupl.28598008s0001	GO:0045261	GO	proton-transporting ATP synthase complex, catalytic core F(1)
Thupl.28598008s0002	PF00006	PFAM	ATP synthase alpha/beta family, nucleotide-binding domain
Thupl.28598008s0002	3.6.3.14	EC	H(+)-transporting two-sector ATPase.
Thupl.28598008s0002	PTHR15184:SF43	PANTHER
Thupl.28598008s0002	PTHR15184	PANTHER	ATP SYNTHASE
Thupl.28598008s0002	GO:0005524	GO	ATP binding
Thupl.28602719s0001	3.1.3.48	EC	Protein-tyrosine-phosphatase.
Thupl.28602719s0001	K18065	KEGGORTH
Thupl.28602719s0001	PTHR10828:SF63	PANTHER
Thupl.28602719s0001	PF00581	PFAM	Rhodanese-like domain
Thupl.28602719s0001	PTHR10828	PANTHER	M-PHASE INDUCER PHOSPHATASE (DUAL SPECIFICITY PHOSPHATASE CDC25)
Thupl.28602879s0001	1.14.13.109	EC	Abieta-7,13-dien-18-ol hydroxylase.
Thupl.28602879s0001	GO:0016705	GO	oxidoreductase activity, acting on paired donors, with incorporation or reduction of molecular oxygen
Thupl.28602879s0001	GO:0020037	GO	heme binding
Thupl.28602879s0001	PTHR24298:SF337	PANTHER
Thupl.28602879s0001	GO:0005506	GO	iron ion binding
Thupl.28602879s0001	GO:0055114	GO	oxidation-reduction process
Thupl.28602879s0001	PF00067	PFAM	Cytochrome P450
Thupl.28602879s0001	PTHR24298	PANTHER	FAMILY NOT NAMED
Thupl.28605389s0001	PF13561	PFAM	Enoyl-(Acyl carrier protein) reductase
Thupl.28605389s0001	1.3.1.34	EC	2,4-dienoyl-CoA reductase (NADPH).
Thupl.28605389s0001	PTHR43296	PANTHER
Thupl.28605389s0001	PTHR43296:SF1	PANTHER
Thupl.28607107s0001	PF00071	PFAM	Ras family
Thupl.28607107s0001	PTHR24073	PANTHER	FAMILY NOT NAMED
Thupl.28607107s0001	GO:0003924	GO	GTPase activity
Thupl.28607107s0001	KOG0394	KOG	Ras-related GTPase
Thupl.28607107s0001	PTHR24073:SF663	PANTHER
Thupl.28607107s0001	K07897	KEGGORTH	Ras-related protein Rab-7A
Thupl.28607107s0001	GO:0005525	GO	GTP binding
Thupl.28608448s0001	GO:0006886	GO	intracellular protein transport
Thupl.28608448s0001	PTHR13509	PANTHER	SEC61BETA-PROV PROTEIN
Thupl.28608448s0001	GO:0005784	GO	Sec61 translocon complex
Thupl.28608448s0001	PF03911	PFAM	Sec61beta family
Thupl.28608448s0001	PTHR13509:SF8	PANTHER
Thupl.28608907s0001	PF01190	PFAM	Pollen proteins Ole e I like
Thupl.28608907s0001	PTHR31614	PANTHER	FAMILY NOT NAMED
Thupl.28610758s0001	PF00067	PFAM	Cytochrome P450
Thupl.28610758s0001	GO:0005506	GO	iron ion binding
Thupl.28610758s0001	GO:0055114	GO	oxidation-reduction process
Thupl.28610758s0001	PTHR24296	PANTHER	FAMILY NOT NAMED
Thupl.28610758s0001	1.14.15.3	EC	Alkane 1-monooxygenase.
Thupl.28610758s0001	GO:0016705	GO	oxidoreductase activity, acting on paired donors, with incorporation or reduction of molecular oxygen
Thupl.28610758s0001	GO:0020037	GO	heme binding
Thupl.28610758s0001	KOG0157	KOG	Cytochrome P450 CYP4/CYP19/CYP26 subfamilies
Thupl.28612570s0001	GO:0008137	GO	NADH dehydrogenase (ubiquinone) activity
Thupl.28612570s0001	PTHR33269	PANTHER
Thupl.28612570s0001	PF00499	PFAM	NADH-ubiquinone/plastoquinone oxidoreductase chain 6
Thupl.28612570s0001	GO:0055114	GO	oxidation-reduction process
Thupl.28612570s0001	PTHR33269:SF3	PANTHER
Thupl.28612570s0001	K05578	KEGGORTH	NADH dehydrogenase I subunit 6 [EC:1.6.5.3]
Thupl.28612570s0002	PTHR11432:SF13	PANTHER	NADH DEHYDROGENASE SUBUNIT 1
Thupl.28612570s0002	PF00146	PFAM	NADH dehydrogenase
Thupl.28612570s0002	KOG4770	KOG	NADH dehydrogenase subunit 1
Thupl.28612570s0002	PTHR11432	PANTHER	NADH DEHYDROGENASE SUBUNIT 1
Thupl.28612570s0002	GO:0016020	GO	membrane
Thupl.28612570s0002	GO:0055114	GO	oxidation-reduction process
Thupl.28612923s0001	PF03732	PFAM	Retrotransposon gag protein
Thupl.28612923s0001	PTHR33223	PANTHER
Thupl.28614628s0001	PTHR33223	PANTHER
Thupl.28616608s0001	SignalP-TM	SIGNALP
Thupl.28617888s0001	PTHR31549	PANTHER	FAMILY NOT NAMED
Thupl.28617888s0001	PF03140	PFAM	Plant protein of unknown function
Thupl.28617888s0001	PTHR31549:SF23	PANTHER
Thupl.28618226s0001	PF01749	PFAM	Importin beta binding domain
Thupl.28618226s0001	PTHR23316	PANTHER	IMPORTIN ALPHA
Thupl.28618226s0001	GO:0005737	GO	cytoplasm
Thupl.28618226s0001	GO:0008565	GO	protein transporter activity
Thupl.28618226s0001	GO:0005515	GO	protein binding
Thupl.28618226s0001	GO:0005634	GO	nucleus
Thupl.28618226s0001	PF00514	PFAM	Armadillo/beta-catenin-like repeat
Thupl.28618226s0001	PTHR23316:SF22	PANTHER
Thupl.28618226s0001	GO:0006606	GO	protein import into nucleus
Thupl.28620802s0001	SignalP-noTM	SIGNALP
Thupl.28625202s0001	2.7.11.1	EC	Non-specific serine/threonine protein kinase.
Thupl.28625202s0001	GO:0004672	GO	protein kinase activity
Thupl.28625202s0001	PF13855	PFAM	Leucine rich repeat
Thupl.28625202s0001	PTHR43887	PANTHER
Thupl.28625202s0001	PF00069	PFAM	Protein kinase domain
Thupl.28625202s0001	GO:0005524	GO	ATP binding
Thupl.28625202s0001	GO:0005515	GO	protein binding
Thupl.28625202s0001	GO:0006468	GO	protein phosphorylation
Thupl.28625202s0002	PF07714	PFAM	Protein tyrosine kinase
Thupl.28625202s0002	2.7.11.1	EC	Non-specific serine/threonine protein kinase.
Thupl.28625202s0002	GO:0004672	GO	protein kinase activity
Thupl.28625202s0002	PTHR43887	PANTHER
Thupl.28625202s0002	PF00069	PFAM	Protein kinase domain
Thupl.28625202s0002	GO:0005524	GO	ATP binding
Thupl.28625202s0002	GO:0006468	GO	protein phosphorylation
Thupl.28627287s0001	PTHR10209	PANTHER	OXIDOREDUCTASE, 2OG-FE(II) OXYGENASE FAMILY PROTEIN
Thupl.28627287s0001	GO:0016491	GO	oxidoreductase activity
Thupl.28627287s0001	1.14.11.13	EC	Gibberellin 2-beta-dioxygenase.
Thupl.28627287s0001	GO:0055114	GO	oxidation-reduction process
Thupl.28627287s0001	PTHR10209:SF384	PANTHER
Thupl.28627287s0001	PF03171	PFAM	2OG-Fe(II) oxygenase superfamily
Thupl.28628724s0001	SignalP-noTM	SIGNALP
Thupl.28630336s0001	PTHR43930	PANTHER
Thupl.28633692s0001	PTHR36785	PANTHER
Thupl.28633692s0001	SignalP-noTM	SIGNALP
Thupl.28635191s0001	PTHR43887	PANTHER
Thupl.28635191s0001	GO:0004672	GO	protein kinase activity
Thupl.28635191s0001	2.7.11.1	EC	Non-specific serine/threonine protein kinase.
Thupl.28635191s0001	PF07714	PFAM	Protein tyrosine kinase
Thupl.28635191s0001	GO:0006468	GO	protein phosphorylation
Thupl.28635508s0001	PTHR31225	PANTHER	FAMILY NOT NAMED
Thupl.28635508s0001	GO:0016829	GO	lyase activity
Thupl.28635508s0001	GO:0010333	GO	terpene synthase activity
Thupl.28635508s0001	GO:0000287	GO	magnesium ion binding
Thupl.28635508s0001	4.2.3.32	EC	Levopimaradiene synthase.
Thupl.28635508s0001	PF03936	PFAM	Terpene synthase family, metal binding domain
Thupl.28641722s0001	PTHR20889:SF6	PANTHER	SUBFAMILY NOT NAMED
Thupl.28641722s0001	3.6.1.1	EC	Inorganic diphosphatase.
Thupl.28641722s0001	K13248	KEGGORTH	pyridoxal phosphate phosphatase PHOSPHO2 [EC:3.1.3.74]
Thupl.28641722s0001	KOG3120	KOG	Predicted haloacid dehalogenase-like hydrolase
Thupl.28641722s0001	PTHR20889	PANTHER	PHOSPHATASE, ORPHAN 1, 2
Thupl.28641722s0001	PF06888	PFAM	Putative Phosphatase
Thupl.28641722s0001	GO:0016791	GO	phosphatase activity
Thupl.28642067s0001	GO:0006355	GO	regulation of transcription, DNA-dependent
Thupl.28642067s0001	GO:0003700	GO	sequence-specific DNA binding transcription factor activity
Thupl.28642067s0001	PF00847	PFAM	AP2 domain
Thupl.28642067s0001	PTHR31985	PANTHER	FAMILY NOT NAMED
Thupl.28642067s0001	PTHR31985:SF5	PANTHER
Thupl.28645641s0001	PF00931	PFAM	NB-ARC domain
Thupl.28645641s0001	PTHR11017	PANTHER	LEUCINE-RICH REPEAT-CONTAINING PROTEIN
Thupl.28645641s0001	GO:0043531	GO	ADP binding
Thupl.28646679s0001	1.10.3.9	EC	Photosystem II.
Thupl.28646679s0001	GO:0019684	GO	photosynthesis, light reaction
Thupl.28646679s0001	PF00124	PFAM	Photosynthetic reaction centre protein
Thupl.28646679s0001	PTHR33149:SF11	PANTHER
Thupl.28646679s0001	GO:0045156	GO	electron transporter, transferring electrons within the cyclic electron transport pathway of photosynthesis activity
Thupl.28646679s0001	PTHR33149	PANTHER
Thupl.28646679s0001	K02703	KEGGORTH	photosystem II P680 reaction center D1 protein
Thupl.28646679s0001	GO:0009772	GO	photosynthetic electron transport in photosystem II
Thupl.28646679s0002	GO:0015995	GO	chlorophyll biosynthetic process
Thupl.28646679s0002	PTHR42864	PANTHER
Thupl.28646679s0002	1.3.7.7	EC	Ferredoxin:protochlorophyllide reductase (ATP-dependent).
Thupl.28646679s0002	KOG3022	KOG	Predicted ATPase, nucleotide-binding
Thupl.28646679s0002	PTHR42864:SF1	PANTHER
Thupl.28646679s0002	GO:0016730	GO	oxidoreductase activity, acting on iron-sulfur proteins as donors
[truncated: 166,193 more rows]
